# Supplementary material for: Gut microbiome is associated with the clinical response to anti-PD-1 based immunotherapy in hepatobiliary cancers
Source: PubMed Central journal article supplement — J Immunother Cancer. 2021 Dec 6;9(12):e003334. doi: 10.1136/jitc-2021-003334 (PMC8650503; doi:10.1136/jitc-2021-003334), 2021-12-06
Supplement: jitc-2021-003334supp001.pdf [file jitc-2021-003334supp001.pdf]

Supplementary Figures

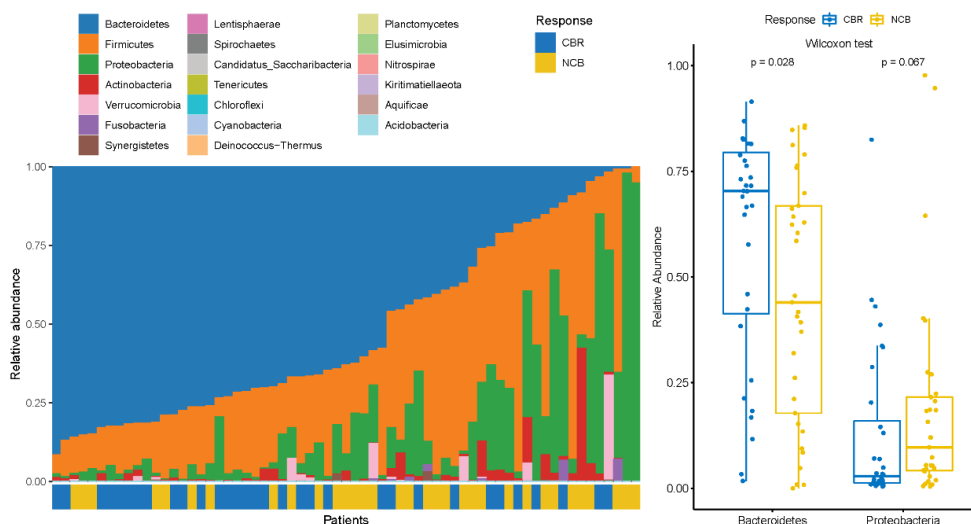

**Figure S1** Gut microbiome composition at the phylum level in 65 patients with hepatobiliary cancers (ordered by the most abundant taxa, Bacteroidetes phylum). CBR, clinical benefit response; NCB, non-clinical benefit.

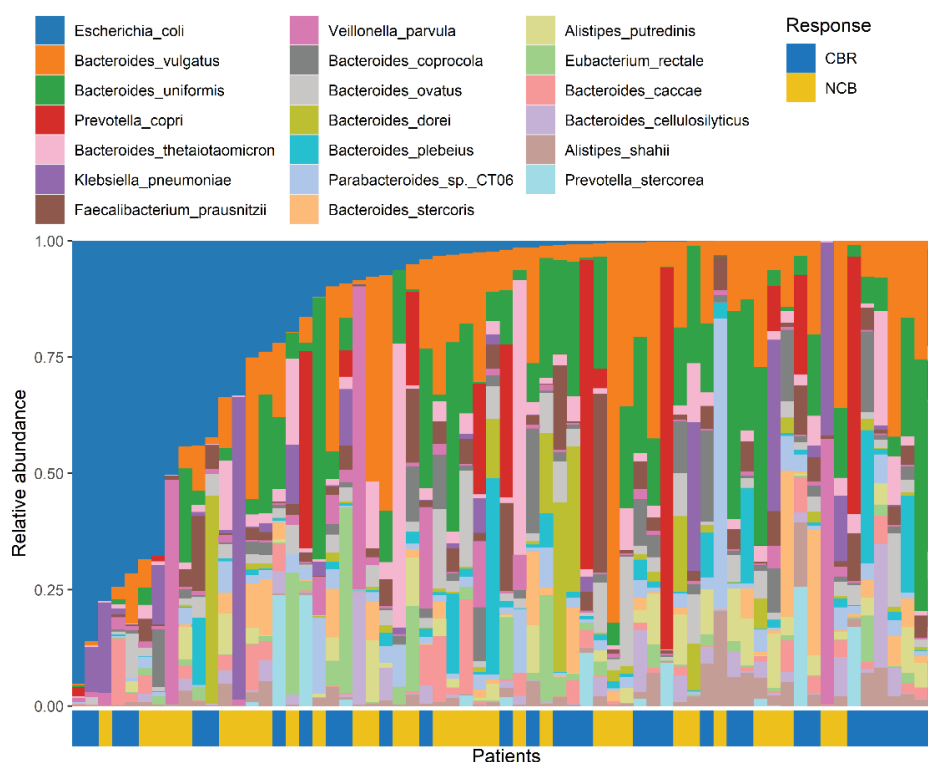

**Figure S2** Gut microbiome composition at the species level in 65 patients with hepatobiliary cancers. CBR, clinical benefit response; NCB, non-clinical benefit.

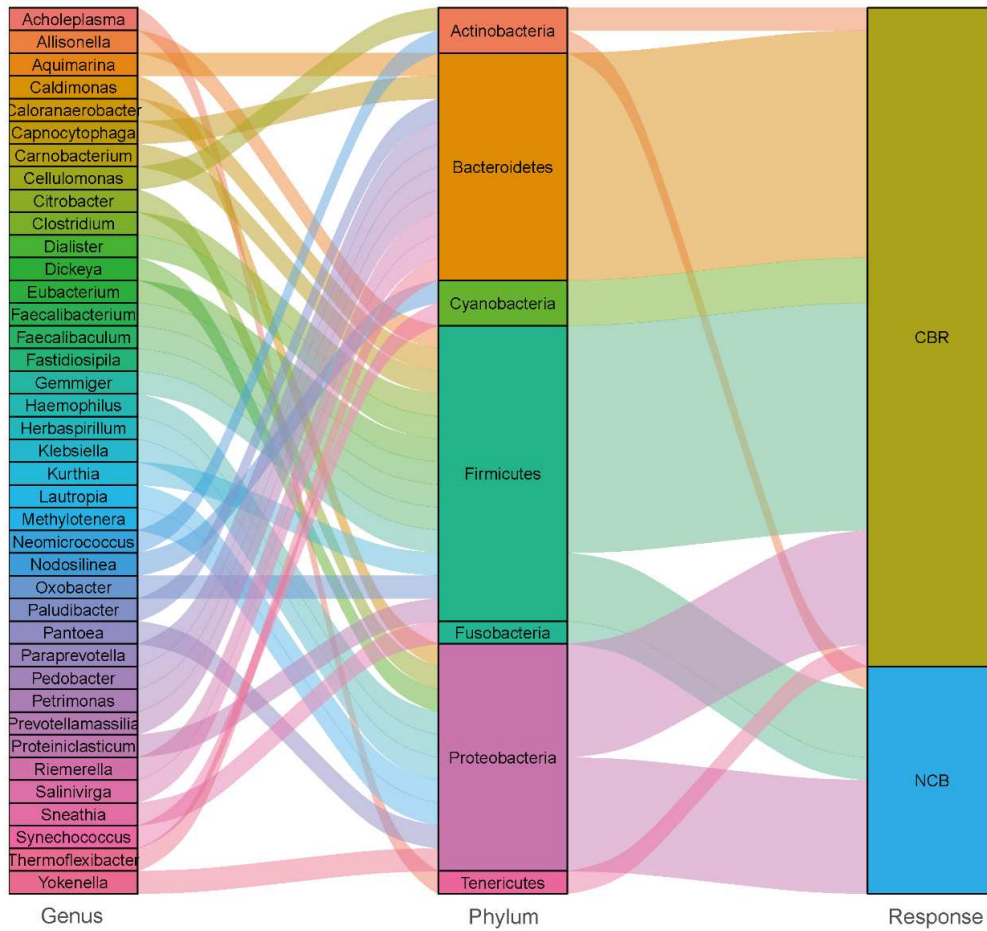

**Figure S3** Statistically different genera between the CBR group and NCB group. CBR, clinical benefit response; NCB, non-clinical benefit.

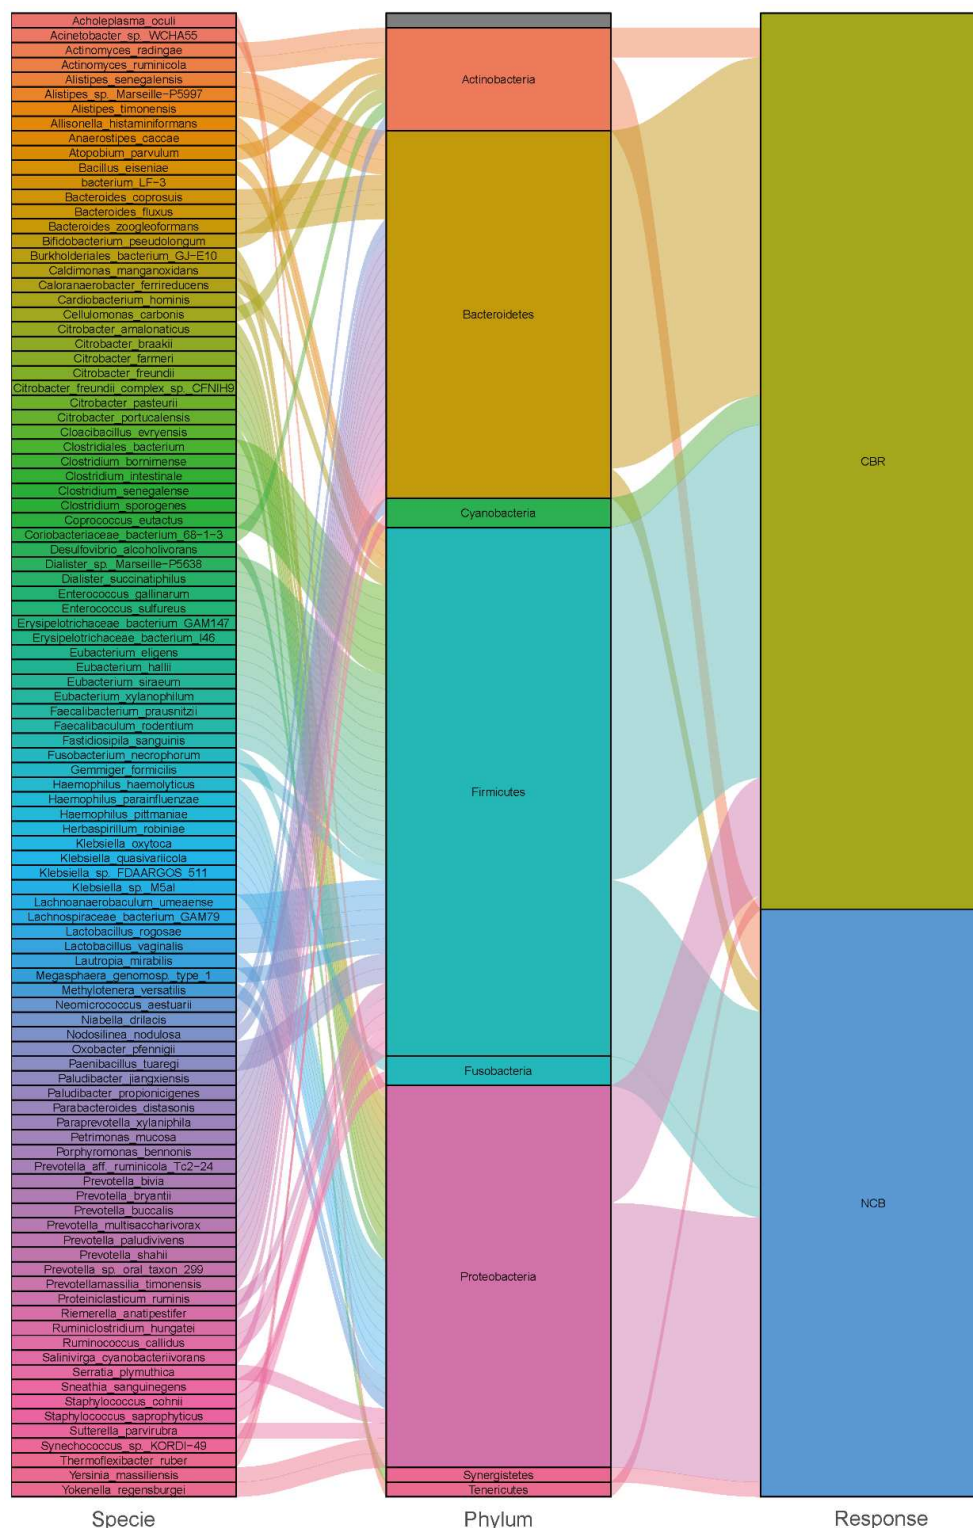

**Figure S4** Statistically different species between the CBR group and NCB group. CBR, clinical benefit response; NCB, non-clinical benefit.

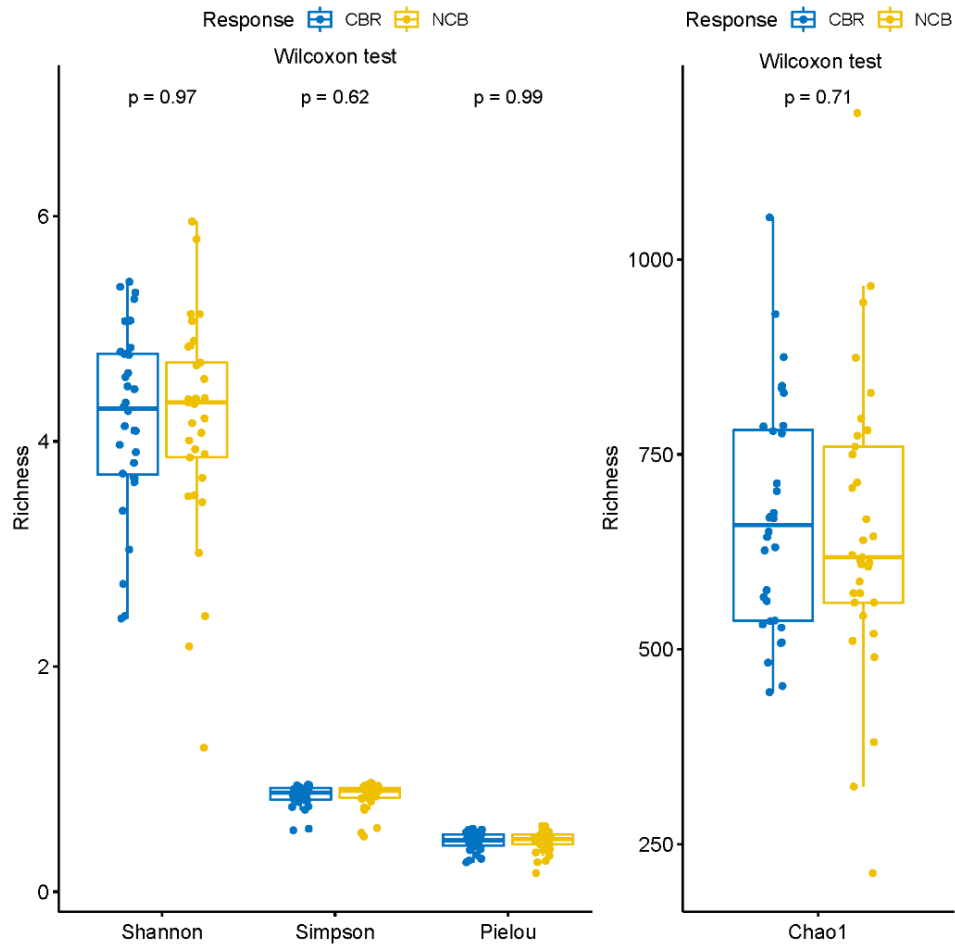

**Figure S5** Gut microbiome alpha diversity comparison between the CBR group and NCB group (Wilcoxon test). CBR, clinical benefit response; NCB, non-clinical benefit.

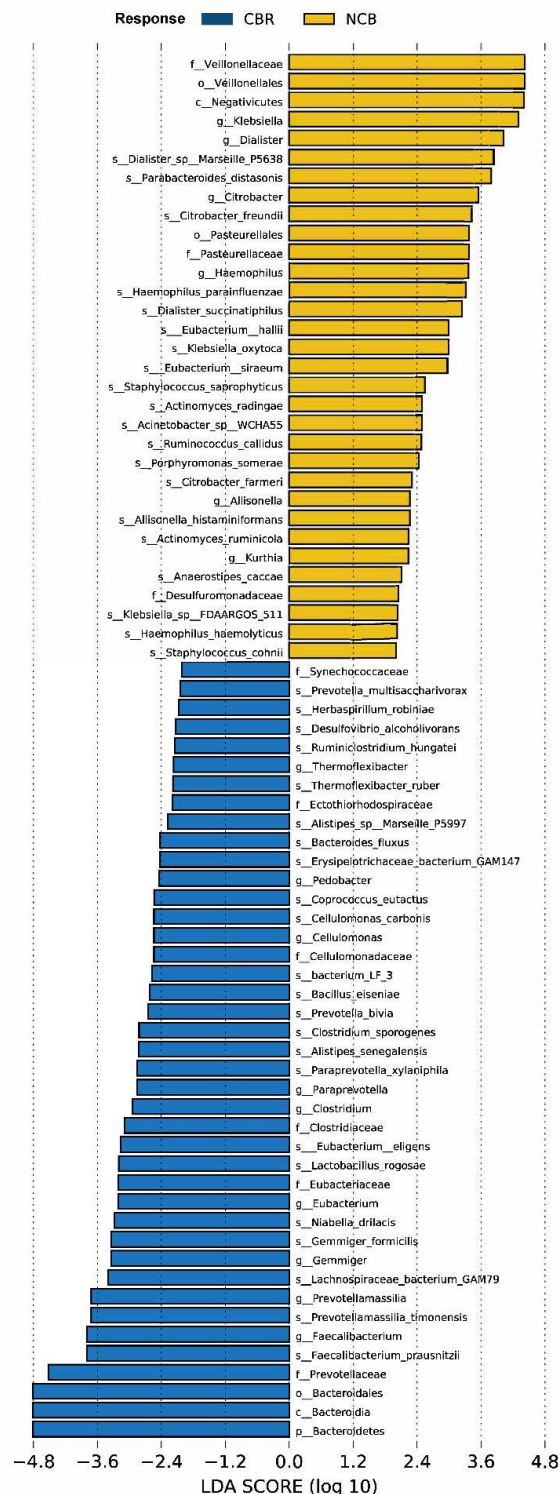

**Figure S6** Significantly differentially enriched taxa in the CBR group and NCB group identified by LEfSe (LDA>2, p<0.05). CBR, clinical benefit response; NCB, non-clinical benefit; LDA, linear discriminant analysis; LEfSe, linear discriminant analysis effect size.

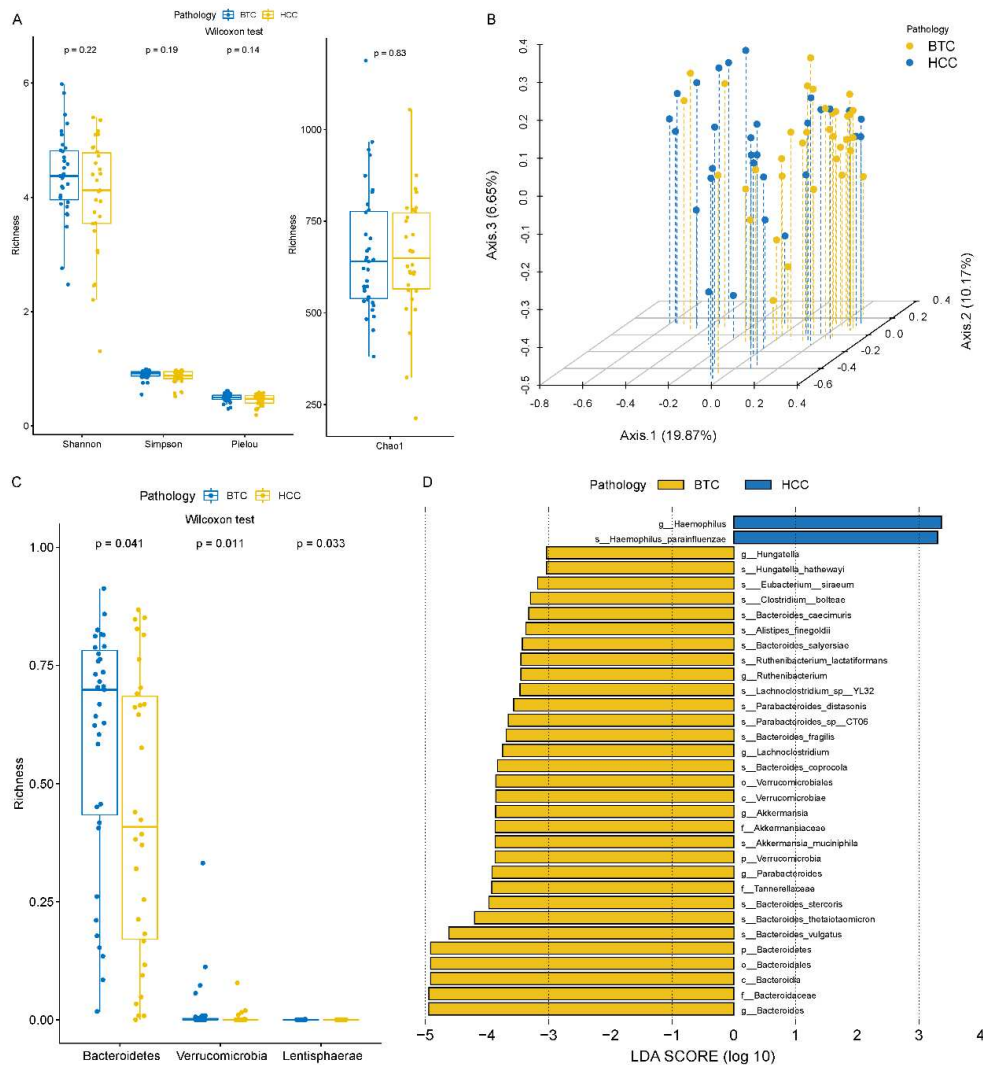

**Figure S7 (A)** Gut microbiome alpha diversity comparison between the HCC subgroup and BTC subgroup (Wilcoxon test). **(B)** PCoA showed the beta diversity evaluated by Bray-Curtis distance between the HCC subgroup and BTC subgroup. **(C)** Significantly different phylum between the HCC subgroup and BTC subgroup (Wilcoxon test). **(D)** Significantly differentially enriched taxa in patients with HCC and BTC identified by LEfSe of the 30 patients with HCC (LDA>3, p<0.05). HCC, hepatocellular carcinoma; BTC, biliary tract cancer; PCoA, principal coordinate analysis; LEfSe, linear discriminant analysis effect size; LDA, linear discriminant analysis.



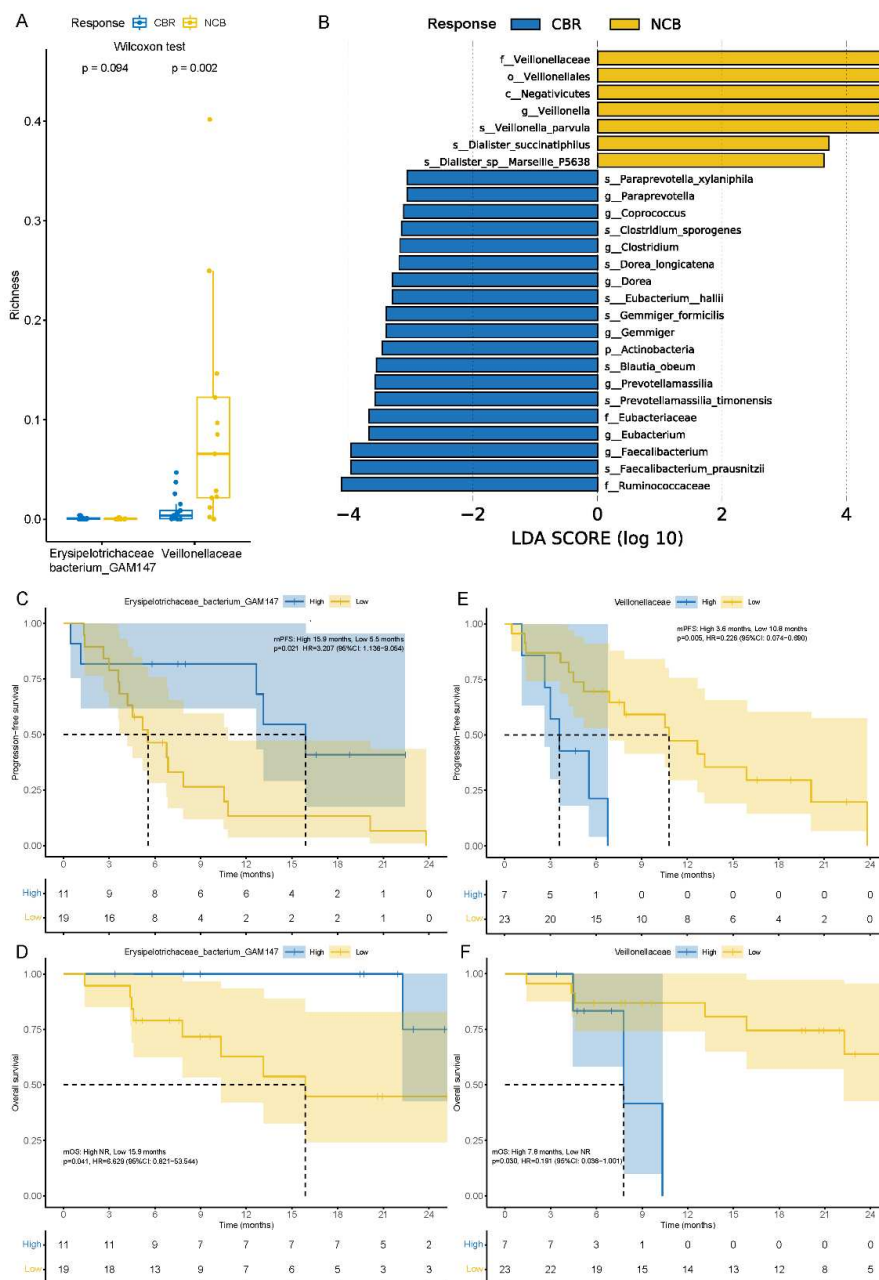

**Figure S8** (A) Relative abundance comparison of Erysipelotrichaceae bacterium-GAM147 and Veillonellaceae family in the CBR group and NCB group among the 30 HCC patients (Wilcoxon test). (B) Significantly differentially enriched taxa in the CBR group and NCB group among the 30 HCC patients identified by LefSe (LDA > 3, p < 0.05). The Kaplan-Meier method with log-rank test estimates the median progression-free survival and median overall survival for the 30 HCC patients with higher or lower abundance of (C-D) Erysipelotrichaceae bacterium-GAM147 and (E-F) Veillonellaceae family. CBR, clinical benefit response; NCB, non-clinical benefit; HCC, hepatocellular carcinoma; LefSe, linear discriminant analysis effect size; LDA, linear discriminant analysis; mPFS, median progression-free survival; mOS, median overall survival.

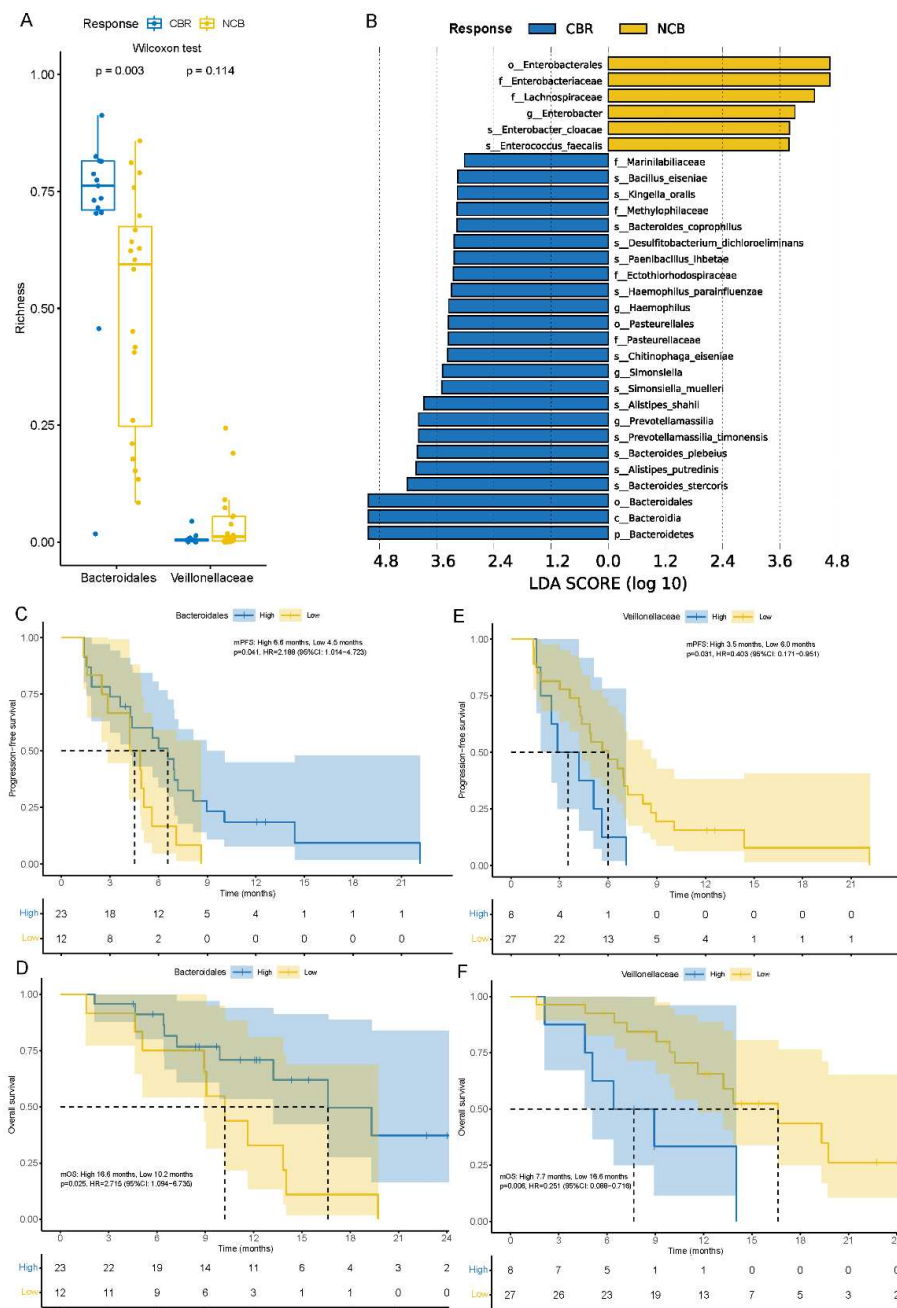

**Figure S9** (A) Relative abundance comparison of Bacteroidales order and Veillonellaceae family in the CBR group and NCB group among the 35 BTC patients (Wilcoxon test). (B) Significantly differentially enriched taxa in the CBR group and NCB group among the 35 BTC patients identified by LefSe (LDA>3, p<0.05). The Kaplan-Meier method with log-rank test estimates the median progression-free survival and median overall survival for the 35 BTC patients with higher or lower abundance of (C-D) Bacteroidales order and (E-F) Veillonellaceae family. CBR, clinical benefit response; NCB, non-clinical benefit; BTC, biliary tract cancer; LefSe, linear discriminant analysis effect size; LDA, linear discriminant analysis; mPFS, median progression-free survival; mOS, median overall survival.



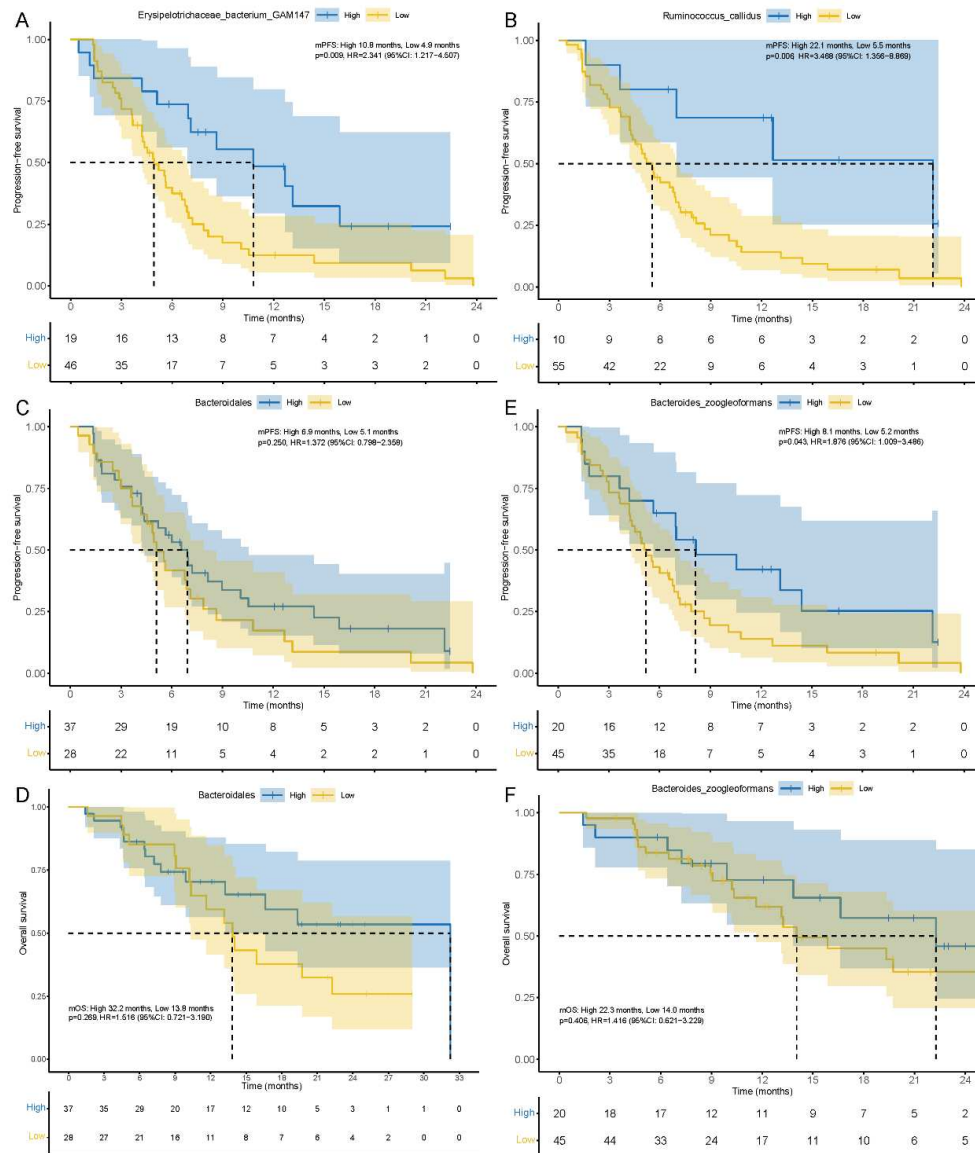

**Figure S10** The Kaplan-Meier method with log-rank test estimates the median progression-free survival and overall survival for all 65 patients with higher or lower abundance of (A) Erysipelotrichaceae bacterium-GAM147, (B) Ruminococcus callidus, (C-D) Bacteroidales order and (E-F) Bacteroides zoogloformans. mPFS, median progression-free survival; mOS, median overall survival.

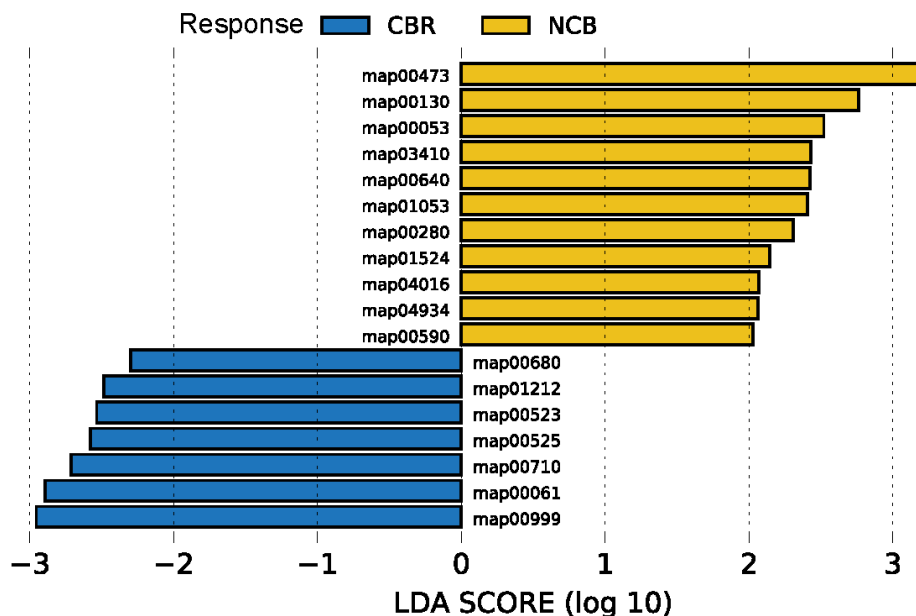

**Figure S11** Significantly different KEGG pathways enriched in the CBR group and NCB group identified by LefSe (LDA>2, p<0.05). KEGG, Kyoto Encyclopedia of Genes and Genomes; CBR, clinical benefit response; NCB, non-clinical benefit; LefSe, linear discriminant analysis effect size; LDA, linear discriminant analysis.

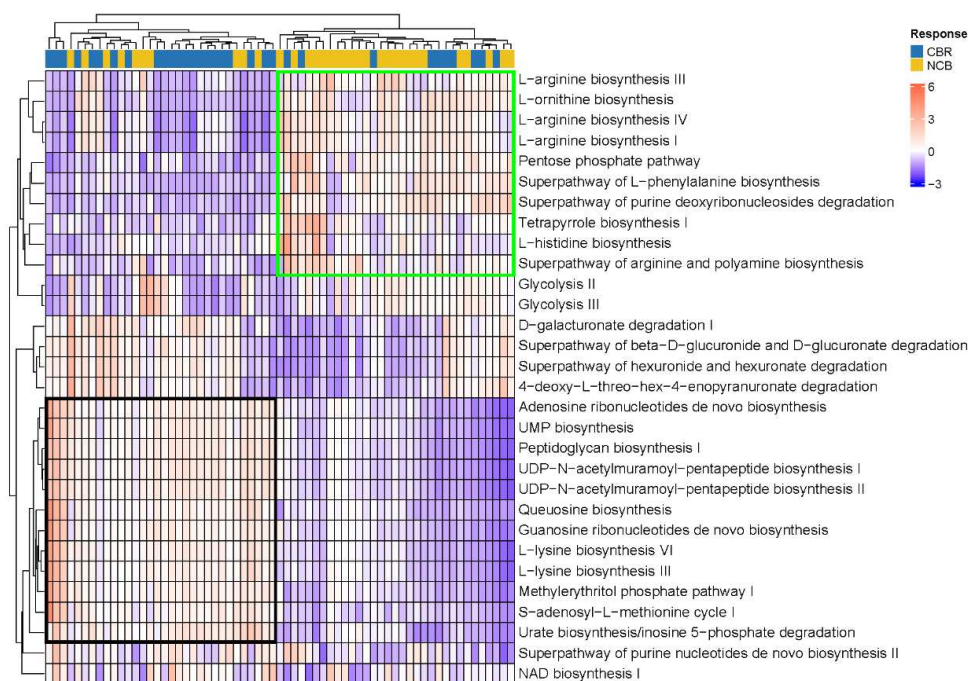

**Figure S12** MetaCyc hierarchy of pathway classifications showed different metabolic pathways enriched in the CBR group and NCB group. CBR, clinical benefit response; NCB, non-clinical benefit.
