# Supplementary material for: Gut microbiome is associated with the clinical response to anti-PD-1 based immunotherapy in hepatobiliary cancers
Source: HighWire-hosted journal article supplement (doi:10.1136/jitc-2021-003334), 2021-12-01
Supplement: jitc-2021-003334supp002_data_supplement.xlsx [file jitc-2021-003334supp002_data_supplement.xlsx]

## Sheet: Table S1. ALL
Phylogenetic_level	Taxonomy	Wilcoxon_Pvalue	CBR_group	NCB_group	Taxonomy_detail
Phylum	p__Bacteroidetes	0.028	High	Low	k__Bacteria;p__Bacteroidetes;
Phylum	p__Cyanobacteria	0.033	High	Low	k__Bacteria;p__Cyanobacteria;
Class	c__Negativicutes	0.007	Low	High	k__Bacteria;p__Firmicutes;c__Negativicutes;
Class	c__Bacteroidia	0.028	High	Low	k__Bacteria;p__Bacteroidetes;c__Bacteroidia;
Class	c__Chitinophagia	0.01	High	Low	k__Bacteria;p__Bacteroidetes;c__Chitinophagia;
Class	c__Cytophagia	0.022	High	Low	k__Bacteria;p__Bacteroidetes;c__Cytophagia;
Order	o__Chitinophagales	0.01	Low	High	k__Bacteria;p__Bacteroidetes;c__Chitinophagia;o__Chitinophagales;
Order	o__Synechococcales	0.003	Low	High	k__Bacteria;p__Cyanobacteria;o__Synechococcales;
Order	o__Veillonellales	0.001	Low	High	k__Bacteria;p__Firmicutes;c__Negativicutes;o__Veillonellales;
Order	o__Nitrosomonadales	0.046	Low	High	k__Bacteria;p__Proteobacteria;c__Betaproteobacteria;o__Nitrosomonadales;
Order	o__Cardiobacteriales	0.037	Low	High	k__Bacteria;p__Proteobacteria;c__Gammaproteobacteria;o__Cardiobacteriales;
Order	o__Pasteurellales	0.036	Low	High	k__Bacteria;p__Proteobacteria;c__Gammaproteobacteria;o__Pasteurellales;
Order	o__Bacteroidales	0.028	High	Low	k__Bacteria;p__Bacteroidetes;c__Bacteroidia;o__Bacteroidales;
Order	o__Cytophagales	0.022	High	Low	k__Bacteria;p__Bacteroidetes;c__Cytophagia;o__Cytophagales;
Family	f__Veillonellaceae	0.001	Low	High	k__Bacteria;p__Firmicutes;c__Negativicutes;o__Veillonellales;f__Veillonellaceae;
Family	f__Leptotrichiaceae	0.027	Low	High	k__Bacteria;p__Fusobacteria;c__Fusobacteriia;o__Fusobacteriales;f__Leptotrichiaceae;
Family	f__Desulfuromonadaceae	0.046	Low	High	k__Bacteria;p__Proteobacteria;c__Deltaproteobacteria;o__Desulfuromonadales;f__Desulfuromonadaceae;
Family	f__Cardiobacteriaceae	0.037	Low	High	k__Bacteria;p__Proteobacteria;c__Gammaproteobacteria;o__Cardiobacteriales;f__Cardiobacteriaceae;
Family	f__Pasteurellaceae	0.036	Low	High	k__Bacteria;p__Proteobacteria;c__Gammaproteobacteria;o__Pasteurellales;f__Pasteurellaceae;
Family	f__Cellulomonadaceae	0.021	High	Low	k__Bacteria;p__Actinobacteria;c__Actinobacteria;o__Micrococcales;f__Cellulomonadaceae;
Family	f__Paludibacteraceae	0.014	High	Low	k__Bacteria;p__Bacteroidetes;c__Bacteroidia;o__Bacteroidales;f__Paludibacteraceae;
Family	f__Prevotellaceae	0.036	High	Low	k__Bacteria;p__Bacteroidetes;c__Bacteroidia;o__Bacteroidales;f__Prevotellaceae;
Family	f__Salinivirgaceae	0.044	High	Low	k__Bacteria;p__Bacteroidetes;c__Bacteroidia;o__Marinilabiliales;f__Salinivirgaceae;
Family	f__Chitinophagaceae	0.01	High	Low	k__Bacteria;p__Bacteroidetes;c__Chitinophagia;o__Chitinophagales;f__Chitinophagaceae;
Family	f__Prochlorotrichaceae	0.039	High	Low	k__Bacteria;p__Cyanobacteria;o__Synechococcales;f__Prochlorotrichaceae;
Family	f__Synechococcaceae	0.027	High	Low	k__Bacteria;p__Cyanobacteria;o__Synechococcales;f__Synechococcaceae;
Family	f__Clostridiaceae	0.027	High	Low	k__Bacteria;p__Firmicutes;c__Clostridia;o__Clostridiales;f__Clostridiaceae;
Family	f__Eubacteriaceae	0.01	High	Low	k__Bacteria;p__Firmicutes;c__Clostridia;o__Clostridiales;f__Eubacteriaceae;
Family	f__Burkholderiaceae	0.023	High	Low	k__Bacteria;p__Proteobacteria;c__Betaproteobacteria;o__Burkholderiales;f__Burkholderiaceae;
Family	f__Methylophilaceae	0.025	High	Low	k__Bacteria;p__Proteobacteria;c__Betaproteobacteria;o__Nitrosomonadales;f__Methylophilaceae;
Family	f__Ectothiorhodospiraceae	0.01	High	Low	k__Bacteria;p__Proteobacteria;c__Gammaproteobacteria;o__Chromatiales;f__Ectothiorhodospiraceae;
Family	f__Erwiniaceae	0.031	High	Low	k__Bacteria;p__Proteobacteria;c__Gammaproteobacteria;o__Enterobacterales;f__Erwiniaceae;
Genus	g__Klebsiella	0.037	Low	High	k__Bacteria;p__Proteobacteria;c__Gammaproteobacteria;o__Enterobacterales;f__Enterobacteriaceae;g__Klebsiella;
Genus	g__Dialister	0.043	Low	High	k__Bacteria;p__Firmicutes;c__Negativicutes;o__Veillonellales;f__Veillonellaceae;g__Dialister;
Genus	g__Citrobacter	0.027	Low	High	k__Bacteria;p__Proteobacteria;c__Gammaproteobacteria;o__Enterobacterales;f__Enterobacteriaceae;g__Citrobacter;
Genus	g__Haemophilus	0.013	Low	High	k__Bacteria;p__Proteobacteria;c__Gammaproteobacteria;o__Pasteurellales;f__Pasteurellaceae;g__Haemophilus;
Genus	g__Allisonella	0.013	Low	High	k__Bacteria;p__Firmicutes;c__Negativicutes;o__Veillonellales;f__Veillonellaceae;g__Allisonella;
Genus	g__Sneathia	0.045	Low	High	k__Bacteria;p__Fusobacteria;c__Fusobacteriia;o__Fusobacteriales;f__Leptotrichiaceae;g__Sneathia;
Genus	g__Neomicrococcus	0.039	Low	High	k__Bacteria;p__Actinobacteria;c__Actinobacteria;o__Micrococcales;f__Micrococcaceae;g__Neomicrococcus;
Genus	g__Lautropia	0.013	Low	High	k__Bacteria;p__Proteobacteria;c__Betaproteobacteria;o__Burkholderiales;f__Burkholderiaceae;g__Lautropia;
Genus	g__Dickeya	0.024	Low	High	k__Bacteria;p__Proteobacteria;c__Gammaproteobacteria;o__Enterobacterales;f__Pectobacteriaceae;g__Dickeya;
Genus	g__Kurthia	0.045	Low	High	k__Bacteria;p__Firmicutes;c__Bacilli;o__Bacillales;f__Planococcaceae;g__Kurthia;
Genus	g__Capnocytophaga	0.035	High	Low	k__Bacteria;p__Bacteroidetes;c__Flavobacteriia;o__Flavobacteriales;f__Flavobacteriaceae;g__Capnocytophaga;
Genus	g__Caloranaerobacter	0.021	High	Low	k__Bacteria;p__Firmicutes;c__Clostridia;o__Clostridiales;f__Clostridiaceae;g__Caloranaerobacter;
Genus	g__Pedobacter	0.039	High	Low	k__Bacteria;p__Bacteroidetes;c__Sphingobacteriia;o__Sphingobacteriales;f__Sphingobacteriaceae;g__Pedobacter;
Genus	g__Acholeplasma	0.05	High	Low	k__Bacteria;p__Tenericutes;c__Mollicutes;o__Acholeplasmatales;f__Acholeplasmataceae;g__Acholeplasma;
Genus	g__Methylotenera	0.047	High	Low	k__Bacteria;p__Proteobacteria;c__Betaproteobacteria;o__Nitrosomonadales;f__Methylophilaceae;g__Methylotenera;
Genus	g__Synechococcus	0.039	High	Low	k__Bacteria;p__Cyanobacteria;o__Synechococcales;f__Synechococcaceae;g__Synechococcus;
Genus	g__Thermoflexibacter	0.039	High	Low	k__Bacteria;p__Bacteroidetes;c__Cytophagia;o__Cytophagales;g__Thermoflexibacter;
Genus	g__Nodosilinea	0.039	High	Low	k__Bacteria;p__Cyanobacteria;o__Synechococcales;f__Prochlorotrichaceae;g__Nodosilinea;
Genus	g__Faecalibaculum	0.022	High	Low	k__Bacteria;p__Firmicutes;c__Erysipelotrichia;o__Erysipelotrichales;f__Erysipelotrichaceae;g__Faecalibaculum;
Genus	g__Salinivirga	0.044	High	Low	k__Bacteria;p__Bacteroidetes;c__Bacteroidia;o__Marinilabiliales;f__Salinivirgaceae;g__Salinivirga;
Genus	g__Herbaspirillum	0.01	High	Low	k__Bacteria;p__Proteobacteria;c__Betaproteobacteria;o__Burkholderiales;f__Oxalobacteraceae;g__Herbaspirillum;
Genus	g__Aquimarina	0.018	High	Low	k__Bacteria;p__Bacteroidetes;c__Flavobacteriia;o__Flavobacteriales;f__Flavobacteriaceae;g__Aquimarina;
Genus	g__Caldimonas	0.02	High	Low	k__Bacteria;p__Proteobacteria;c__Betaproteobacteria;o__Burkholderiales;f__Comamonadaceae;g__Caldimonas;
Genus	g__Yokenella	0.043	High	Low	k__Bacteria;p__Proteobacteria;c__Gammaproteobacteria;o__Enterobacterales;f__Enterobacteriaceae;g__Yokenella;
Genus	g__Oxobacter	0.03	High	Low	k__Bacteria;p__Firmicutes;c__Clostridia;o__Clostridiales;f__Clostridiaceae;g__Oxobacter;
Genus	g__Proteiniclasticum	0.033	High	Low	k__Bacteria;p__Firmicutes;c__Clostridia;o__Clostridiales;f__Clostridiaceae;g__Proteiniclasticum;
Genus	g__Fastidiosipila	0.033	High	Low	k__Bacteria;p__Firmicutes;c__Clostridia;o__Clostridiales;f__Hungateiclostridiaceae;g__Fastidiosipila;
Genus	g__Carnobacterium	0.039	High	Low	k__Bacteria;p__Firmicutes;c__Bacilli;o__Lactobacillales;f__Carnobacteriaceae;g__Carnobacterium;
Genus	g__Paludibacter	0.014	High	Low	k__Bacteria;p__Bacteroidetes;c__Bacteroidia;o__Bacteroidales;f__Paludibacteraceae;g__Paludibacter;
Genus	g__Pantoea	0.03	High	Low	k__Bacteria;p__Proteobacteria;c__Gammaproteobacteria;o__Enterobacterales;f__Erwiniaceae;g__Pantoea;
Genus	g__Petrimonas	0.003	High	Low	k__Bacteria;p__Bacteroidetes;c__Bacteroidia;o__Bacteroidales;f__Porphyromonadaceae;g__Petrimonas;
Genus	g__Riemerella	0.035	High	Low	k__Bacteria;p__Bacteroidetes;c__Flavobacteriia;o__Flavobacteriales;f__Flavobacteriaceae;g__Riemerella;
Genus	g__Cellulomonas	0.021	High	Low	k__Bacteria;p__Actinobacteria;c__Actinobacteria;o__Micrococcales;f__Cellulomonadaceae;g__Cellulomonas;
Genus	g__Paraprevotella	0.017	High	Low	k__Bacteria;p__Bacteroidetes;c__Bacteroidia;o__Bacteroidales;f__Prevotellaceae;g__Paraprevotella;
Genus	g__Clostridium	0.003	High	Low	k__Bacteria;p__Firmicutes;c__Clostridia;o__Clostridiales;f__Clostridiaceae;g__Clostridium;
Genus	g__Eubacterium	0.01	High	Low	k__Bacteria;p__Firmicutes;c__Clostridia;o__Clostridiales;f__Eubacteriaceae;g__Eubacterium;
Genus	g__Gemmiger	0.023	High	Low	k__Bacteria;p__Firmicutes;c__Clostridia;o__Clostridiales;f__Ruminococcaceae;g__Gemmiger;
Genus	g__Faecalibacterium	0.008	High	Low	k__Bacteria;p__Firmicutes;c__Clostridia;o__Clostridiales;f__Ruminococcaceae;g__Faecalibacterium;
Genus	g__Prevotellamassilia	0.002	High	Low	k__Bacteria;p__Bacteroidetes;c__Bacteroidia;o__Bacteroidales;f__Prevotellaceae;g__Prevotellamassilia;
Specie	s__Parabacteroides_distasonis	0.032	Low	High	k__Bacteria;p__Bacteroidetes;c__Bacteroidia;o__Bacteroidales;f__Tannerellaceae;g__Parabacteroides;s__Parabacteroides_distasonis;
Specie	s__Dialister_sp._Marseille-P5638	0.028	Low	High	k__Bacteria;p__Firmicutes;c__Negativicutes;o__Veillonellales;f__Veillonellaceae;g__Dialister;s__Dialister_sp._Marseille-P5638;
Specie	s__Citrobacter_freundii	0.025	Low	High	k__Bacteria;p__Proteobacteria;c__Gammaproteobacteria;o__Enterobacterales;f__Enterobacteriaceae;g__Citrobacter;s__Citrobacter_freundii;
Specie	s__Dialister_succinatiphilus	0.037	Low	High	k__Bacteria;p__Firmicutes;c__Negativicutes;o__Veillonellales;f__Veillonellaceae;g__Dialister;s__Dialister_succinatiphilus;
Specie	s__Klebsiella_oxytoca	0.011	Low	High	k__Bacteria;p__Proteobacteria;c__Gammaproteobacteria;o__Enterobacterales;f__Enterobacteriaceae;g__Klebsiella;s__Klebsiella_oxytoca;
Specie	s__Haemophilus_parainfluenzae	0.01	Low	High	k__Bacteria;p__Proteobacteria;c__Gammaproteobacteria;o__Pasteurellales;f__Pasteurellaceae;g__Haemophilus;s__Haemophilus_parainfluenzae;
Specie	s__Citrobacter_farmeri	0.024	Low	High	k__Bacteria;p__Proteobacteria;c__Gammaproteobacteria;o__Enterobacterales;f__Enterobacteriaceae;g__Citrobacter;s__Citrobacter_farmeri;
Specie	s__Allisonella_histaminiformans	0.013	Low	High	k__Bacteria;p__Firmicutes;c__Negativicutes;o__Veillonellales;f__Veillonellaceae;g__Allisonella;s__Allisonella_histaminiformans;
Specie	s__Eubacterium_hallii	0.01	Low	High	k__Bacteria;p__Firmicutes;c__Clostridia;o__Clostridiales;f__Eubacteriaceae;g__Eubacterium;s__Eubacterium_hallii;
Specie	s__Anaerostipes_caccae	0.047	Low	High	k__Bacteria;p__Firmicutes;c__Clostridia;o__Clostridiales;f__Lachnospiraceae;g__Anaerostipes;s__Anaerostipes_caccae;
Specie	s__Klebsiella_sp._FDAARGOS_511	0.009	Low	High	k__Bacteria;p__Proteobacteria;c__Gammaproteobacteria;o__Enterobacterales;f__Enterobacteriaceae;g__Klebsiella;s__Klebsiella_sp._FDAARGOS_511;
Specie	s__Citrobacter_braakii	0.027	Low	High	k__Bacteria;p__Proteobacteria;c__Gammaproteobacteria;o__Enterobacterales;f__Enterobacteriaceae;g__Citrobacter;s__Citrobacter_braakii;
Specie	s__Eubacterium_siraeum	0.035	Low	High	k__Bacteria;p__Firmicutes;c__Clostridia;o__Clostridiales;f__Ruminococcaceae;s__Eubacterium_siraeum;
Specie	s__Erysipelotrichaceae_bacterium_I46	0.009	Low	High	k__Bacteria;p__Firmicutes;c__Erysipelotrichia;o__Erysipelotrichales;f__Erysipelotrichaceae;s__Erysipelotrichaceae_bacterium_I46;
Specie	s__Cloacibacillus_evryensis	0.017	Low	High	k__Bacteria;p__Synergistetes;c__Synergistia;o__Synergistales;f__Synergistaceae;g__Cloacibacillus;s__Cloacibacillus_evryensis;
Specie	s__Citrobacter_portucalensis	0.036	Low	High	k__Bacteria;p__Proteobacteria;c__Gammaproteobacteria;o__Enterobacterales;f__Enterobacteriaceae;g__Citrobacter;s__Citrobacter_portucalensis;
Specie	s__Citrobacter_freundii_complex_sp._CFNIH9	0.029	Low	High	k__Bacteria;p__Proteobacteria;c__Gammaproteobacteria;o__Enterobacterales;f__Enterobacteriaceae;g__Citrobacter;s__Citrobacter_freundii_complex_sp._CFNIH9;
Specie	s__Citrobacter_amalonaticus	0.027	Low	High	k__Bacteria;p__Proteobacteria;c__Gammaproteobacteria;o__Enterobacterales;f__Enterobacteriaceae;g__Citrobacter;s__Citrobacter_amalonaticus;
Specie	s__Klebsiella_quasivariicola	0.025	Low	High	k__Bacteria;p__Proteobacteria;c__Gammaproteobacteria;o__Enterobacterales;f__Enterobacteriaceae;g__Klebsiella;s__Klebsiella_quasivariicola;
Specie	s__Ruminococcus_callidus	0.013	Low	High	k__Bacteria;p__Firmicutes;c__Clostridia;o__Clostridiales;f__Ruminococcaceae;g__Ruminococcus;s__Ruminococcus_callidus;
Specie	s__Klebsiella_sp._M5al	0.008	Low	High	k__Bacteria;p__Proteobacteria;c__Gammaproteobacteria;o__Enterobacterales;f__Enterobacteriaceae;g__Klebsiella;s__Klebsiella_sp._M5al;
Specie	s__Citrobacter_pasteurii	0.043	Low	High	k__Bacteria;p__Proteobacteria;c__Gammaproteobacteria;o__Enterobacterales;f__Enterobacteriaceae;g__Citrobacter;s__Citrobacter_pasteurii;
Specie	s__Sneathia_sanguinegens	0.045	Low	High	k__Bacteria;p__Fusobacteria;c__Fusobacteriia;o__Fusobacteriales;f__Leptotrichiaceae;g__Sneathia;s__Sneathia_sanguinegens;
Specie	s__Fusobacterium_necrophorum	0.047	Low	High	k__Bacteria;p__Fusobacteria;c__Fusobacteriia;o__Fusobacteriales;f__Fusobacteriaceae;g__Fusobacterium;s__Fusobacterium_necrophorum;
Specie	s__Enterococcus_gallinarum	0.024	Low	High	k__Bacteria;p__Firmicutes;c__Bacilli;o__Lactobacillales;f__Enterococcaceae;g__Enterococcus;s__Enterococcus_gallinarum;
Specie	s__Cardiobacterium_hominis	0.04	Low	High	k__Bacteria;p__Proteobacteria;c__Gammaproteobacteria;o__Cardiobacteriales;f__Cardiobacteriaceae;g__Cardiobacterium;s__Cardiobacterium_hominis;
Specie	s__Neomicrococcus_aestuarii	0.039	Low	High	k__Bacteria;p__Actinobacteria;c__Actinobacteria;o__Micrococcales;f__Micrococcaceae;g__Neomicrococcus;s__Neomicrococcus_aestuarii;
Specie	s__Bifidobacterium_pseudolongum	0.04	Low	High	k__Bacteria;p__Actinobacteria;c__Actinobacteria;o__Bifidobacteriales;f__Bifidobacteriaceae;g__Bifidobacterium;s__Bifidobacterium_pseudolongum;
Specie	s__Atopobium_parvulum	0.009	Low	High	k__Bacteria;p__Actinobacteria;c__Coriobacteriia;o__Coriobacteriales;f__Atopobiaceae;g__Atopobium;s__Atopobium_parvulum;
Specie	s__Porphyromonas_bennonis	0.009	Low	High	k__Bacteria;p__Bacteroidetes;c__Bacteroidia;o__Bacteroidales;f__Porphyromonadaceae;g__Porphyromonas;s__Porphyromonas_bennonis;
Specie	s__Haemophilus_haemolyticus	0.021	Low	High	k__Bacteria;p__Proteobacteria;c__Gammaproteobacteria;o__Pasteurellales;f__Pasteurellaceae;g__Haemophilus;s__Haemophilus_haemolyticus;
Specie	s__Lautropia_mirabilis	0.013	Low	High	k__Bacteria;p__Proteobacteria;c__Betaproteobacteria;o__Burkholderiales;f__Burkholderiaceae;g__Lautropia;s__Lautropia_mirabilis;
Specie	s__Serratia_plymuthica	0.017	Low	High	k__Bacteria;p__Proteobacteria;c__Gammaproteobacteria;o__Enterobacterales;f__Yersiniaceae;g__Serratia;s__Serratia_plymuthica;
Specie	s__Yersinia_massiliensis	0.045	Low	High	k__Bacteria;p__Proteobacteria;c__Gammaproteobacteria;o__Enterobacterales;f__Yersiniaceae;g__Yersinia;s__Yersinia_massiliensis;
Specie	s__Enterococcus_sulfureus	0.045	Low	High	k__Bacteria;p__Firmicutes;c__Bacilli;o__Lactobacillales;f__Enterococcaceae;g__Enterococcus;s__Enterococcus_sulfureus;
Specie	s__Staphylococcus_saprophyticus	0.045	Low	High	k__Bacteria;p__Firmicutes;c__Bacilli;o__Bacillales;f__Staphylococcaceae;g__Staphylococcus;s__Staphylococcus_saprophyticus;
Specie	s__Staphylococcus_cohnii	0.045	Low	High	k__Bacteria;p__Firmicutes;c__Bacilli;o__Bacillales;f__Staphylococcaceae;g__Staphylococcus;s__Staphylococcus_cohnii;
Specie	s__Acinetobacter_sp._WCHA55	0.045	Low	High	k__Bacteria;p__Proteobacteria;c__Gammaproteobacteria;o__Pseudomonadales;f__Moraxellaceae;g__Acinetobacter;s__Acinetobacter_sp._WCHA55;
Specie	s__Actinomyces_radingae	0.045	Low	High	k__Bacteria;p__Actinobacteria;c__Actinobacteria;o__Actinomycetales;f__Actinomycetaceae;g__Actinomyces;s__Actinomyces_radingae;
Specie	s__Actinomyces_ruminicola	0.045	Low	High	k__Bacteria;p__Actinobacteria;c__Actinobacteria;o__Actinomycetales;f__Actinomycetaceae;g__Actinomyces;s__Actinomyces_ruminicola;
Specie	s__Caloranaerobacter_ferrireducens	0.021	High	Low	k__Bacteria;p__Firmicutes;c__Clostridia;o__Clostridiales;f__Clostridiaceae;g__Caloranaerobacter;s__Caloranaerobacter_ferrireducens;
Specie	s__Bacillus_eiseniae	0.02	High	Low	k__Bacteria;p__Firmicutes;c__Bacilli;o__Bacillales;f__Bacillaceae;g__Bacillus;s__Bacillus_eiseniae;
Specie	s__Ruminiclostridium_hungatei	0.031	High	Low	k__Bacteria;p__Firmicutes;c__Clostridia;o__Clostridiales;f__Hungateiclostridiaceae;g__Ruminiclostridium;s__Ruminiclostridium_hungatei;
Specie	s__Desulfovibrio_alcoholivorans	0.039	High	Low	k__Bacteria;p__Proteobacteria;c__Deltaproteobacteria;o__Desulfovibrionales;f__Desulfovibrionaceae;g__Desulfovibrio;s__Desulfovibrio_alcoholivorans;
Specie	s__Herbaspirillum_robiniae	0.039	High	Low	k__Bacteria;p__Proteobacteria;c__Betaproteobacteria;o__Burkholderiales;f__Oxalobacteraceae;g__Herbaspirillum;s__Herbaspirillum_robiniae;
Specie	s__Acholeplasma_oculi	0.05	High	Low	k__Bacteria;p__Tenericutes;c__Mollicutes;o__Acholeplasmatales;f__Acholeplasmataceae;g__Acholeplasma;s__Acholeplasma_oculi;
Specie	s__Burkholderiales_bacterium_GJ-E10	0.039	High	Low	k__Bacteria;p__Proteobacteria;c__Betaproteobacteria;o__Burkholderiales;s__Burkholderiales_bacterium_GJ-E10;
Specie	s__Synechococcus_sp._KORDI-49	0.039	High	Low	k__Bacteria;p__Cyanobacteria;o__Synechococcales;f__Synechococcaceae;g__Synechococcus;s__Synechococcus_sp._KORDI-49;
Specie	s__Methylotenera_versatilis	0.047	High	Low	k__Bacteria;p__Proteobacteria;c__Betaproteobacteria;o__Nitrosomonadales;f__Methylophilaceae;g__Methylotenera;s__Methylotenera_versatilis;
Specie	s__Clostridium_senegalense	0.041	High	Low	k__Bacteria;p__Firmicutes;c__Clostridia;o__Clostridiales;f__Clostridiaceae;g__Clostridium;s__Clostridium_senegalense;
Specie	s__Thermoflexibacter_ruber	0.039	High	Low	k__Bacteria;p__Bacteroidetes;c__Cytophagia;o__Cytophagales;g__Thermoflexibacter;s__Thermoflexibacter_ruber;
Specie	s__Nodosilinea_nodulosa	0.039	High	Low	k__Bacteria;p__Cyanobacteria;o__Synechococcales;f__Prochlorotrichaceae;g__Nodosilinea;s__Nodosilinea_nodulosa;
Specie	s__Faecalibaculum_rodentium	0.022	High	Low	k__Bacteria;p__Firmicutes;c__Erysipelotrichia;o__Erysipelotrichales;f__Erysipelotrichaceae;g__Faecalibaculum;s__Faecalibaculum_rodentium;
Specie	s__Salinivirga_cyanobacteriivorans	0.044	High	Low	k__Bacteria;p__Bacteroidetes;c__Bacteroidia;o__Marinilabiliales;f__Salinivirgaceae;g__Salinivirga;s__Salinivirga_cyanobacteriivorans;
Specie	s__Caldimonas_manganoxidans	0.02	High	Low	k__Bacteria;p__Proteobacteria;c__Betaproteobacteria;o__Burkholderiales;f__Comamonadaceae;g__Caldimonas;s__Caldimonas_manganoxidans;
Specie	s__Niabella_drilacis	0.02	High	Low	k__Bacteria;p__Bacteroidetes;c__Chitinophagia;o__Chitinophagales;f__Chitinophagaceae;g__Niabella;s__Niabella_drilacis;
Specie	s__Yokenella_regensburgei	0.043	High	Low	k__Bacteria;p__Proteobacteria;c__Gammaproteobacteria;o__Enterobacterales;f__Enterobacteriaceae;g__Yokenella;s__Yokenella_regensburgei;
Specie	s__Paenibacillus_tuaregi	0.024	High	Low	k__Bacteria;p__Firmicutes;c__Bacilli;o__Bacillales;f__Paenibacillaceae;g__Paenibacillus;s__Paenibacillus_tuaregi;
Specie	s__Megasphaera_genomosp._type_1	0.014	High	Low	k__Bacteria;p__Firmicutes;c__Negativicutes;o__Veillonellales;f__Veillonellaceae;g__Megasphaera;s__Megasphaera_genomosp._type_1;
Specie	s__Clostridium_intestinale	0.029	High	Low	k__Bacteria;p__Firmicutes;c__Clostridia;o__Clostridiales;f__Clostridiaceae;g__Clostridium;s__Clostridium_intestinale;
Specie	s__Oxobacter_pfennigii	0.03	High	Low	k__Bacteria;p__Firmicutes;c__Clostridia;o__Clostridiales;f__Clostridiaceae;g__Oxobacter;s__Oxobacter_pfennigii;
Specie	s__Coriobacteriaceae_bacterium_68-1-3	0.038	High	Low	k__Bacteria;p__Actinobacteria;c__Coriobacteriia;o__Coriobacteriales;f__Coriobacteriaceae;s__Coriobacteriaceae_bacterium_68-1-3;
Specie	s__Paludibacter_jiangxiensis	0.021	High	Low	k__Bacteria;p__Bacteroidetes;c__Bacteroidia;o__Bacteroidales;f__Paludibacteraceae;g__Paludibacter;s__Paludibacter_jiangxiensis;
Specie	s__Clostridium_bornimense	0.047	High	Low	k__Bacteria;p__Firmicutes;c__Clostridia;o__Clostridiales;f__Clostridiaceae;g__Clostridium;s__Clostridium_bornimense;
Specie	s__Eubacterium_xylanophilum	0.016	High	Low	k__Bacteria;p__Firmicutes;c__Clostridia;o__Clostridiales;f__Eubacteriaceae;g__Eubacterium;s__Eubacterium_xylanophilum;
Specie	s__Proteiniclasticum_ruminis	0.033	High	Low	k__Bacteria;p__Firmicutes;c__Clostridia;o__Clostridiales;f__Clostridiaceae;g__Proteiniclasticum;s__Proteiniclasticum_ruminis;
Specie	s__Paludibacter_propionicigenes	0.011	High	Low	k__Bacteria;p__Bacteroidetes;c__Bacteroidia;o__Bacteroidales;f__Paludibacteraceae;g__Paludibacter;s__Paludibacter_propionicigenes;
Specie	s__Fastidiosipila_sanguinis	0.033	High	Low	k__Bacteria;p__Firmicutes;c__Clostridia;o__Clostridiales;f__Hungateiclostridiaceae;g__Fastidiosipila;s__Fastidiosipila_sanguinis;
Specie	s__Lachnoanaerobaculum_umeaense	0.047	High	Low	k__Bacteria;p__Firmicutes;c__Clostridia;o__Clostridiales;f__Lachnospiraceae;g__Lachnoanaerobaculum;s__Lachnoanaerobaculum_umeaense;
Specie	s__Clostridiales_bacterium	0.026	High	Low	k__Bacteria;p__Firmicutes;c__Clostridia;o__Clostridiales;s__Clostridiales_bacterium;
Specie	s__Prevotella_aff._ruminicola_Tc2-24	0.009	High	Low	k__Bacteria;p__Bacteroidetes;c__Bacteroidia;o__Bacteroidales;f__Prevotellaceae;g__Prevotella;s__Prevotella_aff._ruminicola_Tc2-24;
Specie	s__Prevotella_paludivivens	0.046	High	Low	k__Bacteria;p__Bacteroidetes;c__Bacteroidia;o__Bacteroidales;f__Prevotellaceae;g__Prevotella;s__Prevotella_paludivivens;
Specie	s__Sutterella_parvirubra	0.034	High	Low	k__Bacteria;p__Proteobacteria;c__Betaproteobacteria;o__Burkholderiales;f__Sutterellaceae;g__Sutterella;s__Sutterella_parvirubra;
Specie	s__Petrimonas_mucosa	0.003	High	Low	k__Bacteria;p__Bacteroidetes;c__Bacteroidia;o__Bacteroidales;f__Porphyromonadaceae;g__Petrimonas;s__Petrimonas_mucosa;
Specie	s__Riemerella_anatipestifer	0.035	High	Low	k__Bacteria;p__Bacteroidetes;c__Flavobacteriia;o__Flavobacteriales;f__Flavobacteriaceae;g__Riemerella;s__Riemerella_anatipestifer;
Specie	s__Prevotella_sp._oral_taxon_299	0.013	High	Low	k__Bacteria;p__Bacteroidetes;c__Bacteroidia;o__Bacteroidales;f__Prevotellaceae;g__Prevotella;s__Prevotella_sp._oral_taxon_299;
Specie	s__Haemophilus_pittmaniae	0.04	High	Low	k__Bacteria;p__Proteobacteria;c__Gammaproteobacteria;o__Pasteurellales;f__Pasteurellaceae;g__Haemophilus;s__Haemophilus_pittmaniae;
Specie	s__Bacteroides_zoogleoformans	0.031	High	Low	k__Bacteria;p__Bacteroidetes;c__Bacteroidia;o__Bacteroidales;f__Bacteroidaceae;g__Bacteroides;s__Bacteroides_zoogleoformans;
Specie	s__Prevotella_shahii	0.015	High	Low	k__Bacteria;p__Bacteroidetes;c__Bacteroidia;o__Bacteroidales;f__Prevotellaceae;g__Prevotella;s__Prevotella_shahii;
Specie	s__Prevotella_bryantii	0.041	High	Low	k__Bacteria;p__Bacteroidetes;c__Bacteroidia;o__Bacteroidales;f__Prevotellaceae;g__Prevotella;s__Prevotella_bryantii;
Specie	s__Bacteroides_coprosuis	0.046	High	Low	k__Bacteria;p__Bacteroidetes;c__Bacteroidia;o__Bacteroidales;f__Bacteroidaceae;g__Bacteroides;s__Bacteroides_coprosuis;
Specie	s__Prevotella_buccalis	0.026	High	Low	k__Bacteria;p__Bacteroidetes;c__Bacteroidia;o__Bacteroidales;f__Prevotellaceae;g__Prevotella;s__Prevotella_buccalis;
Specie	s__Lactobacillus_vaginalis	0.034	High	Low	k__Bacteria;p__Firmicutes;c__Bacilli;o__Lactobacillales;f__Lactobacillaceae;g__Lactobacillus;s__Lactobacillus_vaginalis;
Specie	s__Alistipes_timonensis	0.048	High	Low	k__Bacteria;p__Bacteroidetes;c__Bacteroidia;o__Bacteroidales;f__Rikenellaceae;g__Alistipes;s__Alistipes_timonensis;
Specie	s__Prevotella_multisaccharivorax	0.029	High	Low	k__Bacteria;p__Bacteroidetes;c__Bacteroidia;o__Bacteroidales;f__Prevotellaceae;g__Prevotella;s__Prevotella_multisaccharivorax;
Specie	s__Alistipes_sp._Marseille-P5997	0.024	High	Low	k__Bacteria;p__Bacteroidetes;c__Bacteroidia;o__Bacteroidales;f__Rikenellaceae;g__Alistipes;s__Alistipes_sp._Marseille-P5997;
Specie	s__Erysipelotrichaceae_bacterium_GAM147	0.031	High	Low	k__Bacteria;p__Firmicutes;c__Erysipelotrichia;o__Erysipelotrichales;f__Erysipelotrichaceae;s__Erysipelotrichaceae_bacterium_GAM147;
Specie	s__Bacteroides_fluxus	0.012	High	Low	k__Bacteria;p__Bacteroidetes;c__Bacteroidia;o__Bacteroidales;f__Bacteroidaceae;g__Bacteroides;s__Bacteroides_fluxus;
Specie	s__Coprococcus_eutactus	0.023	High	Low	k__Bacteria;p__Firmicutes;c__Clostridia;o__Clostridiales;f__Lachnospiraceae;g__Coprococcus;s__Coprococcus_eutactus;
Specie	s__bacterium_LF-3	0.02	High	Low	k__Bacteria;s__bacterium_LF-3;
Specie	s__Cellulomonas_carbonis	0.021	High	Low	k__Bacteria;p__Actinobacteria;c__Actinobacteria;o__Micrococcales;f__Cellulomonadaceae;g__Cellulomonas;s__Cellulomonas_carbonis;
Specie	s__Prevotella_bivia	0.02	High	Low	k__Bacteria;p__Bacteroidetes;c__Bacteroidia;o__Bacteroidales;f__Prevotellaceae;g__Prevotella;s__Prevotella_bivia;
Specie	s__Alistipes_senegalensis	0.035	High	Low	k__Bacteria;p__Bacteroidetes;c__Bacteroidia;o__Bacteroidales;f__Rikenellaceae;g__Alistipes;s__Alistipes_senegalensis;
Specie	s__Clostridium_sporogenes	0.006	High	Low	k__Bacteria;p__Firmicutes;c__Clostridia;o__Clostridiales;f__Clostridiaceae;g__Clostridium;s__Clostridium_sporogenes;
Specie	s__Paraprevotella_xylaniphila	0.017	High	Low	k__Bacteria;p__Bacteroidetes;c__Bacteroidia;o__Bacteroidales;f__Prevotellaceae;g__Paraprevotella;s__Paraprevotella_xylaniphila;
Specie	s__Eubacterium_eligens	0.01	High	Low	k__Bacteria;p__Firmicutes;c__Clostridia;o__Clostridiales;f__Eubacteriaceae;g__Eubacterium;s__Eubacterium_eligens;
Specie	s__Lactobacillus_rogosae	0.043	High	Low	k__Bacteria;p__Firmicutes;c__Bacilli;o__Lactobacillales;f__Lactobacillaceae;g__Lactobacillus;s__Lactobacillus_rogosae;
Specie	s__Gemmiger_formicilis	0.023	High	Low	k__Bacteria;p__Firmicutes;c__Clostridia;o__Clostridiales;f__Ruminococcaceae;g__Gemmiger;s__Gemmiger_formicilis;
Specie	s__Lachnospiraceae_bacterium_GAM79	0.015	High	Low	k__Bacteria;p__Firmicutes;c__Clostridia;o__Clostridiales;f__Lachnospiraceae;s__Lachnospiraceae_bacterium_GAM79;
Specie	s__Faecalibacterium_prausnitzii	0.008	High	Low	k__Bacteria;p__Firmicutes;c__Clostridia;o__Clostridiales;f__Ruminococcaceae;g__Faecalibacterium;s__Faecalibacterium_prausnitzii;
Specie	s__Prevotellamassilia_timonensis	0.002	High	Low	k__Bacteria;p__Bacteroidetes;c__Bacteroidia;o__Bacteroidales;f__Prevotellaceae;g__Prevotellamassilia;s__Prevotellamassilia_timonensis;

## Sheet: Table S2. Pathology
Taxonomy	Wilcoxon_Pvalue	HCC_group	BTC_group	Taxonomy_detail
p__Bacteroidetes	0.041	Low	High	k__Bacteria;p__Bacteroidetes;
p__Lentisphaerae	0.033	Low	High	k__Bacteria;p__Lentisphaerae;
p__Verrucomicrobia	0.011	Low	High	k__Bacteria;p__Verrucomicrobia;
c__Bacteroidia	0.041	Low	High	k__Bacteria;p__Bacteroidetes;c__Bacteroidia;
c__Lentisphaeria	0.033	Low	High	k__Bacteria;p__Lentisphaerae;c__Lentisphaeria;
c__Opitutae	0.011	Low	High	k__Bacteria;p__Verrucomicrobia;c__Opitutae;
c__Verrucomicrobiae	0.012	Low	High	k__Bacteria;p__Verrucomicrobia;c__Verrucomicrobiae;
o__Streptosporangiales	0.039	Low	High	k__Bacteria;p__Actinobacteria;c__Actinobacteria;o__Streptosporangiales;
o__Bacteroidales	0.041	Low	High	k__Bacteria;p__Bacteroidetes;c__Bacteroidia;o__Bacteroidales;
o__Selenomonadales	0.007	Low	High	k__Bacteria;p__Firmicutes;c__Negativicutes;o__Selenomonadales;
o__Rhizobiales	0.048	Low	High	k__Bacteria;p__Proteobacteria;c__Alphaproteobacteria;o__Rhizobiales;
o__Neisseriales	0.044	High	Low	k__Bacteria;p__Proteobacteria;c__Betaproteobacteria;o__Neisseriales;
o__Opitutales	0.011	Low	High	k__Bacteria;p__Verrucomicrobia;c__Opitutae;o__Opitutales;
o__Verrucomicrobiales	0.012	Low	High	k__Bacteria;p__Verrucomicrobia;c__Verrucomicrobiae;o__Verrucomicrobiales;
f__Microbacteriaceae	0.009	Low	High	k__Bacteria;p__Actinobacteria;c__Actinobacteria;o__Micrococcales;f__Microbacteriaceae;
f__Bacteroidaceae	0.013	Low	High	k__Bacteria;p__Bacteroidetes;c__Bacteroidia;o__Bacteroidales;f__Bacteroidaceae;
f__Muribaculaceae	0.021	Low	High	k__Bacteria;p__Bacteroidetes;c__Bacteroidia;o__Bacteroidales;f__Muribaculaceae;
f__Tannerellaceae	0.005	Low	High	k__Bacteria;p__Bacteroidetes;c__Bacteroidia;o__Bacteroidales;f__Tannerellaceae;
f__Cytophagaceae	0.039	High	Low	k__Bacteria;p__Bacteroidetes;c__Cytophagia;o__Cytophagales;f__Cytophagaceae;
f__Carnobacteriaceae	0.025	High	Low	k__Bacteria;p__Firmicutes;c__Bacilli;o__Lactobacillales;f__Carnobacteriaceae;
f__Catabacteriaceae	0.034	Low	High	k__Bacteria;p__Firmicutes;c__Clostridia;o__Clostridiales;f__Catabacteriaceae;
f__Clostridiales_Family_XII._Incertae_Sedis	0.043	Low	High	k__Bacteria;p__Firmicutes;c__Clostridia;o__Clostridiales;f__Clostridiales_Family_XII._Incertae_Sedis;
f__Oscillospiraceae	0.023	Low	High	k__Bacteria;p__Firmicutes;c__Clostridia;o__Clostridiales;f__Oscillospiraceae;
f__Selenomonadaceae	0.012	Low	High	k__Bacteria;p__Firmicutes;c__Negativicutes;o__Selenomonadales;f__Selenomonadaceae;
f__Methylobacteriaceae	0.02	Low	High	k__Bacteria;p__Proteobacteria;c__Alphaproteobacteria;o__Rhizobiales;f__Methylobacteriaceae;
f__Neisseriaceae	0.042	High	Low	k__Bacteria;p__Proteobacteria;c__Betaproteobacteria;o__Neisseriales;f__Neisseriaceae;
f__Pseudomonadaceae	0.049	Low	High	k__Bacteria;p__Proteobacteria;c__Gammaproteobacteria;o__Pseudomonadales;f__Pseudomonadaceae;
f__Opitutaceae	0.011	Low	High	k__Bacteria;p__Verrucomicrobia;c__Opitutae;o__Opitutales;f__Opitutaceae;
f__Akkermansiaceae	0.012	Low	High	k__Bacteria;p__Verrucomicrobia;c__Verrucomicrobiae;o__Verrucomicrobiales;f__Akkermansiaceae;
g__Paeniglutamicibacter	0.034	High	Low	k__Bacteria;p__Actinobacteria;c__Actinobacteria;o__Micrococcales;f__Micrococcaceae;g__Paeniglutamicibacter;
g__Eggerthella	0.036	High	Low	k__Bacteria;p__Actinobacteria;c__Coriobacteriia;o__Eggerthellales;f__Eggerthellaceae;g__Eggerthella;
g__Bacteroides	0.012	Low	High	k__Bacteria;p__Bacteroidetes;c__Bacteroidia;o__Bacteroidales;f__Bacteroidaceae;g__Bacteroides;
g__Muribaculum	0.021	Low	High	k__Bacteria;p__Bacteroidetes;c__Bacteroidia;o__Bacteroidales;f__Muribaculaceae;g__Muribaculum;
g__Butyricimonas	0.005	Low	High	k__Bacteria;p__Bacteroidetes;c__Bacteroidia;o__Bacteroidales;f__Odoribacteraceae;g__Butyricimonas;
g__Sanguibacteroides	0.035	High	Low	k__Bacteria;p__Bacteroidetes;c__Bacteroidia;o__Bacteroidales;f__Porphyromonadaceae;g__Sanguibacteroides;
g__Parabacteroides	0.006	Low	High	k__Bacteria;p__Bacteroidetes;c__Bacteroidia;o__Bacteroidales;f__Tannerellaceae;g__Parabacteroides;
g__Capnocytophaga	0.038	Low	High	k__Bacteria;p__Bacteroidetes;c__Flavobacteriia;o__Flavobacteriales;f__Flavobacteriaceae;g__Capnocytophaga;
g__Tumebacillus	0.006	Low	High	k__Bacteria;p__Firmicutes;c__Bacilli;o__Bacillales;f__Alicyclobacillaceae;g__Tumebacillus;
g__Thermobacillus	0.022	Low	High	k__Bacteria;p__Firmicutes;c__Bacilli;o__Bacillales;f__Paenibacillaceae;g__Thermobacillus;
g__Facklamia	0.045	Low	High	k__Bacteria;p__Firmicutes;c__Bacilli;o__Lactobacillales;f__Aerococcaceae;g__Facklamia;
g__Catabacter	0.034	Low	High	k__Bacteria;p__Firmicutes;c__Clostridia;o__Clostridiales;f__Catabacteriaceae;g__Catabacter;
g__Hungatella	0.003	Low	High	k__Bacteria;p__Firmicutes;c__Clostridia;o__Clostridiales;f__Clostridiaceae;g__Hungatella;
g__Acidaminobacter	0.043	Low	High	k__Bacteria;p__Firmicutes;c__Clostridia;o__Clostridiales;f__Clostridiales_Family_XII._Incertae_Sedis;g__Acidaminobacter;
g__Emergencia	0.008	Low	High	k__Bacteria;p__Firmicutes;c__Clostridia;o__Clostridiales;f__Clostridiales_Family_XIII._Incertae_Sedis;g__Emergencia;
g__Intestinibacillus	0.027	Low	High	k__Bacteria;p__Firmicutes;c__Clostridia;o__Clostridiales;f__Eubacteriaceae;g__Intestinibacillus;
g__Eisenbergiella	0.004	Low	High	k__Bacteria;p__Firmicutes;c__Clostridia;o__Clostridiales;f__Lachnospiraceae;g__Eisenbergiella;
g__Lachnoclostridium	0.022	Low	High	k__Bacteria;p__Firmicutes;c__Clostridia;o__Clostridiales;f__Lachnospiraceae;g__Lachnoclostridium;
g__Oscillibacter	0.023	Low	High	k__Bacteria;p__Firmicutes;c__Clostridia;o__Clostridiales;f__Oscillospiraceae;g__Oscillibacter;
g__Anaerotruncus	0.022	Low	High	k__Bacteria;p__Firmicutes;c__Clostridia;o__Clostridiales;f__Ruminococcaceae;g__Anaerotruncus;
g__Angelakisella	0.015	Low	High	k__Bacteria;p__Firmicutes;c__Clostridia;o__Clostridiales;f__Ruminococcaceae;g__Angelakisella;
g__Ethanoligenens	0.019	High	Low	k__Bacteria;p__Firmicutes;c__Clostridia;o__Clostridiales;f__Ruminococcaceae;g__Ethanoligenens;
g__Massilimaliae	0.025	Low	High	k__Bacteria;p__Firmicutes;c__Clostridia;o__Clostridiales;f__Ruminococcaceae;g__Massilimaliae;
g__Ruthenibacterium	0.019	Low	High	k__Bacteria;p__Firmicutes;c__Clostridia;o__Clostridiales;f__Ruminococcaceae;g__Ruthenibacterium;
g__Subdoligranulum	0.034	Low	High	k__Bacteria;p__Firmicutes;c__Clostridia;o__Clostridiales;f__Ruminococcaceae;g__Subdoligranulum;
g__Intestinimonas	0.03	Low	High	k__Bacteria;p__Firmicutes;c__Clostridia;o__Clostridiales;g__Intestinimonas;
g__Holdemania	0.031	Low	High	k__Bacteria;p__Firmicutes;c__Erysipelotrichia;o__Erysipelotrichales;f__Erysipelotrichaceae;g__Holdemania;
g__Kandleria	0.003	High	Low	k__Bacteria;p__Firmicutes;c__Erysipelotrichia;o__Erysipelotrichales;f__Erysipelotrichaceae;g__Kandleria;
g__Ndongobacter	0.019	Low	High	k__Bacteria;p__Firmicutes;g__Ndongobacter;
g__Eikenella	0.011	High	Low	k__Bacteria;p__Proteobacteria;c__Betaproteobacteria;o__Neisseriales;f__Neisseriaceae;g__Eikenella;
g__Kingella	0.019	High	Low	k__Bacteria;p__Proteobacteria;c__Betaproteobacteria;o__Neisseriales;f__Neisseriaceae;g__Kingella;
g__Candidatus_Hamiltonella	0.006	High	Low	k__Bacteria;p__Proteobacteria;c__Gammaproteobacteria;o__Enterobacterales;f__Enterobacteriaceae;g__Candidatus_Hamiltonella;
g__Candidatus_Ishikawaella	0.006	High	Low	k__Bacteria;p__Proteobacteria;c__Gammaproteobacteria;o__Enterobacterales;f__Enterobacteriaceae;g__Candidatus_Ishikawaella;
g__Leclercia	0.022	High	Low	k__Bacteria;p__Proteobacteria;c__Gammaproteobacteria;o__Enterobacterales;f__Enterobacteriaceae;g__Leclercia;
g__Haemophilus	0.043	High	Low	k__Bacteria;p__Proteobacteria;c__Gammaproteobacteria;o__Pasteurellales;f__Pasteurellaceae;g__Haemophilus;
g__Cloacibacillus	0.044	Low	High	k__Bacteria;p__Synergistetes;c__Synergistia;o__Synergistales;f__Synergistaceae;g__Cloacibacillus;
g__Akkermansia	0.012	Low	High	k__Bacteria;p__Verrucomicrobia;c__Verrucomicrobiae;o__Verrucomicrobiales;f__Akkermansiaceae;g__Akkermansia;
s__Actinomyces_nasicola	0.019	Low	High	k__Bacteria;p__Actinobacteria;c__Actinobacteria;o__Actinomycetales;f__Actinomycetaceae;g__Actinomyces;s__Actinomyces_nasicola;
s__Bifidobacterium_animalis	0.011	Low	High	k__Bacteria;p__Actinobacteria;c__Actinobacteria;o__Bifidobacteriales;f__Bifidobacteriaceae;g__Bifidobacterium;s__Bifidobacterium_animalis;
s__Bifidobacterium_thermophilum	0.006	Low	High	k__Bacteria;p__Actinobacteria;c__Actinobacteria;o__Bifidobacteriales;f__Bifidobacteriaceae;g__Bifidobacterium;s__Bifidobacterium_thermophilum;
s__Microbacterium_humi	0.034	Low	High	k__Bacteria;p__Actinobacteria;c__Actinobacteria;o__Micrococcales;f__Microbacteriaceae;g__Microbacterium;s__Microbacterium_humi;
s__Paeniglutamicibacter_antarcticus	0.034	High	Low	k__Bacteria;p__Actinobacteria;c__Actinobacteria;o__Micrococcales;f__Micrococcaceae;g__Paeniglutamicibacter;s__Paeniglutamicibacter_antarcticus;
s__Olsenella_umbonata	0.018	Low	High	k__Bacteria;p__Actinobacteria;c__Coriobacteriia;o__Coriobacteriales;f__Atopobiaceae;g__Olsenella;s__Olsenella_umbonata;
s__Eggerthella_lenta	0.032	High	Low	k__Bacteria;p__Actinobacteria;c__Coriobacteriia;o__Eggerthellales;f__Eggerthellaceae;g__Eggerthella;s__Eggerthella_lenta;
s__Gordonibacter_massiliensis	0.025	Low	High	k__Bacteria;p__Actinobacteria;c__Coriobacteriia;o__Eggerthellales;f__Eggerthellaceae;g__Gordonibacter;s__Gordonibacter_massiliensis;
s__Bacteroides_caecimuris	0.005	Low	High	k__Bacteria;p__Bacteroidetes;c__Bacteroidia;o__Bacteroidales;f__Bacteroidaceae;g__Bacteroides;s__Bacteroides_caecimuris;
s__Bacteroides_coprocola	0.046	Low	High	k__Bacteria;p__Bacteroidetes;c__Bacteroidia;o__Bacteroidales;f__Bacteroidaceae;g__Bacteroides;s__Bacteroides_coprocola;
s__Bacteroides_faecichinchillae	0.006	Low	High	k__Bacteria;p__Bacteroidetes;c__Bacteroidia;o__Bacteroidales;f__Bacteroidaceae;g__Bacteroides;s__Bacteroides_faecichinchillae;
s__Bacteroides_fragilis	0.001	Low	High	k__Bacteria;p__Bacteroidetes;c__Bacteroidia;o__Bacteroidales;f__Bacteroidaceae;g__Bacteroides;s__Bacteroides_fragilis;
s__Bacteroides_helcogenes	0.01	Low	High	k__Bacteria;p__Bacteroidetes;c__Bacteroidia;o__Bacteroidales;f__Bacteroidaceae;g__Bacteroides;s__Bacteroides_helcogenes;
s__Bacteroides_neonati	0.023	Low	High	k__Bacteria;p__Bacteroidetes;c__Bacteroidia;o__Bacteroidales;f__Bacteroidaceae;g__Bacteroides;s__Bacteroides_neonati;
s__Bacteroides_nordii	0.003	Low	High	k__Bacteria;p__Bacteroidetes;c__Bacteroidia;o__Bacteroidales;f__Bacteroidaceae;g__Bacteroides;s__Bacteroides_nordii;
s__Bacteroides_reticulotermitis	0.01	Low	High	k__Bacteria;p__Bacteroidetes;c__Bacteroidia;o__Bacteroidales;f__Bacteroidaceae;g__Bacteroides;s__Bacteroides_reticulotermitis;
s__Bacteroides_salyersiae	0.001	Low	High	k__Bacteria;p__Bacteroidetes;c__Bacteroidia;o__Bacteroidales;f__Bacteroidaceae;g__Bacteroides;s__Bacteroides_salyersiae;
s__Bacteroides_stercoris	0.042	Low	High	k__Bacteria;p__Bacteroidetes;c__Bacteroidia;o__Bacteroidales;f__Bacteroidaceae;g__Bacteroides;s__Bacteroides_stercoris;
s__Bacteroides_thetaiotaomicron	0.001	Low	High	k__Bacteria;p__Bacteroidetes;c__Bacteroidia;o__Bacteroidales;f__Bacteroidaceae;g__Bacteroides;s__Bacteroides_thetaiotaomicron;
s__Bacteroides_vulgatus	0.039	Low	High	k__Bacteria;p__Bacteroidetes;c__Bacteroidia;o__Bacteroidales;f__Bacteroidaceae;g__Bacteroides;s__Bacteroides_vulgatus;
s__Barnesiella_viscericola	0.047	Low	High	k__Bacteria;p__Bacteroidetes;c__Bacteroidia;o__Bacteroidales;f__Barnesiellaceae;g__Barnesiella;s__Barnesiella_viscericola;
s__Muribaculum_intestinale	0.021	Low	High	k__Bacteria;p__Bacteroidetes;c__Bacteroidia;o__Bacteroidales;f__Muribaculaceae;g__Muribaculum;s__Muribaculum_intestinale;
s__Butyricimonas_synergistica	0.005	Low	High	k__Bacteria;p__Bacteroidetes;c__Bacteroidia;o__Bacteroidales;f__Odoribacteraceae;g__Butyricimonas;s__Butyricimonas_synergistica;
s__Odoribacter_laneus	0.02	Low	High	k__Bacteria;p__Bacteroidetes;c__Bacteroidia;o__Bacteroidales;f__Odoribacteraceae;g__Odoribacter;s__Odoribacter_laneus;
s__Sanguibacteroides_justesenii	0.035	High	Low	k__Bacteria;p__Bacteroidetes;c__Bacteroidia;o__Bacteroidales;f__Porphyromonadaceae;g__Sanguibacteroides;s__Sanguibacteroides_justesenii;
s__Alistipes_finegoldii	0.01	Low	High	k__Bacteria;p__Bacteroidetes;c__Bacteroidia;o__Bacteroidales;f__Rikenellaceae;g__Alistipes;s__Alistipes_finegoldii;
s__Alistipes_indistinctus	0.022	Low	High	k__Bacteria;p__Bacteroidetes;c__Bacteroidia;o__Bacteroidales;f__Rikenellaceae;g__Alistipes;s__Alistipes_indistinctus;
s__Alistipes_inops	0.046	Low	High	k__Bacteria;p__Bacteroidetes;c__Bacteroidia;o__Bacteroidales;f__Rikenellaceae;g__Alistipes;s__Alistipes_inops;
s__Alistipes_timonensis	0.041	Low	High	k__Bacteria;p__Bacteroidetes;c__Bacteroidia;o__Bacteroidales;f__Rikenellaceae;g__Alistipes;s__Alistipes_timonensis;
s__Parabacteroides_chartae	0.012	Low	High	k__Bacteria;p__Bacteroidetes;c__Bacteroidia;o__Bacteroidales;f__Tannerellaceae;g__Parabacteroides;s__Parabacteroides_chartae;
s__Parabacteroides_distasonis	0.002	Low	High	k__Bacteria;p__Bacteroidetes;c__Bacteroidia;o__Bacteroidales;f__Tannerellaceae;g__Parabacteroides;s__Parabacteroides_distasonis;
s__Parabacteroides_goldsteinii	0.005	Low	High	k__Bacteria;p__Bacteroidetes;c__Bacteroidia;o__Bacteroidales;f__Tannerellaceae;g__Parabacteroides;s__Parabacteroides_goldsteinii;
s__Parabacteroides_sp._CT06	0.006	Low	High	k__Bacteria;p__Bacteroidetes;c__Bacteroidia;o__Bacteroidales;f__Tannerellaceae;g__Parabacteroides;s__Parabacteroides_sp._CT06;
s__Myroides_odoratimimus	0.025	High	Low	k__Bacteria;p__Bacteroidetes;c__Flavobacteriia;o__Flavobacteriales;f__Flavobacteriaceae;g__Myroides;s__Myroides_odoratimimus;
s__Anaerolineaceae_bacterium_oral_taxon_439	0.034	High	Low	k__Bacteria;p__Chloroflexi;c__Anaerolineae;o__Anaerolineales;f__Anaerolineaceae;s__Anaerolineaceae_bacterium_oral_taxon_439;
s__Tumebacillus_avium	0.011	Low	High	k__Bacteria;p__Firmicutes;c__Bacilli;o__Bacillales;f__Alicyclobacillaceae;g__Tumebacillus;s__Tumebacillus_avium;
s__Paraliobacillus_ryukyuensis	0.034	Low	High	k__Bacteria;p__Firmicutes;c__Bacilli;o__Bacillales;f__Bacillaceae;g__Paraliobacillus;s__Paraliobacillus_ryukyuensis;
s__Thermobacillus_composti	0.022	Low	High	k__Bacteria;p__Firmicutes;c__Bacilli;o__Bacillales;f__Paenibacillaceae;g__Thermobacillus;s__Thermobacillus_composti;
s__Facklamia_languida	0.039	High	Low	k__Bacteria;p__Firmicutes;c__Bacilli;o__Lactobacillales;f__Aerococcaceae;g__Facklamia;s__Facklamia_languida;
s__Carnobacterium_maltaromaticum	0.013	High	Low	k__Bacteria;p__Firmicutes;c__Bacilli;o__Lactobacillales;f__Carnobacteriaceae;g__Carnobacterium;s__Carnobacterium_maltaromaticum;
s__Granulicatella_elegans	0.047	High	Low	k__Bacteria;p__Firmicutes;c__Bacilli;o__Lactobacillales;f__Carnobacteriaceae;g__Granulicatella;s__Granulicatella_elegans;
s__Lactobacillus_backii	0.033	High	Low	k__Bacteria;p__Firmicutes;c__Bacilli;o__Lactobacillales;f__Lactobacillaceae;g__Lactobacillus;s__Lactobacillus_backii;
s__Lactobacillus_diolivorans	0.019	High	Low	k__Bacteria;p__Firmicutes;c__Bacilli;o__Lactobacillales;f__Lactobacillaceae;g__Lactobacillus;s__Lactobacillus_diolivorans;
s__Lactobacillus_saerimneri	0.011	High	Low	k__Bacteria;p__Firmicutes;c__Bacilli;o__Lactobacillales;f__Lactobacillaceae;g__Lactobacillus;s__Lactobacillus_saerimneri;
s__Lactobacillus_xiangfangensis	0.028	High	Low	k__Bacteria;p__Firmicutes;c__Bacilli;o__Lactobacillales;f__Lactobacillaceae;g__Lactobacillus;s__Lactobacillus_xiangfangensis;
s__Leuconostoc_carnosum	0.037	High	Low	k__Bacteria;p__Firmicutes;c__Bacilli;o__Lactobacillales;f__Leuconostocaceae;g__Leuconostoc;s__Leuconostoc_carnosum;
s__Streptococcus_equi	0.019	High	Low	k__Bacteria;p__Firmicutes;c__Bacilli;o__Lactobacillales;f__Streptococcaceae;g__Streptococcus;s__Streptococcus_equi;
s__Streptococcus_mitis	0.013	High	Low	k__Bacteria;p__Firmicutes;c__Bacilli;o__Lactobacillales;f__Streptococcaceae;g__Streptococcus;s__Streptococcus_mitis;
s__Streptococcus_pneumoniae	0.01	High	Low	k__Bacteria;p__Firmicutes;c__Bacilli;o__Lactobacillales;f__Streptococcaceae;g__Streptococcus;s__Streptococcus_pneumoniae;
s__Streptococcus_pseudopneumoniae	0.017	High	Low	k__Bacteria;p__Firmicutes;c__Bacilli;o__Lactobacillales;f__Streptococcaceae;g__Streptococcus;s__Streptococcus_pseudopneumoniae;
s__Streptococcus_sp._ChDC_B345	0.021	High	Low	k__Bacteria;p__Firmicutes;c__Bacilli;o__Lactobacillales;f__Streptococcaceae;g__Streptococcus;s__Streptococcus_sp._ChDC_B345;
s__Catabacter_hongkongensis	0.034	Low	High	k__Bacteria;p__Firmicutes;c__Clostridia;o__Clostridiales;f__Catabacteriaceae;g__Catabacter;s__Catabacter_hongkongensis;
s__Christensenella_sp._Marseille-P3954	0.033	Low	High	k__Bacteria;p__Firmicutes;c__Clostridia;o__Clostridiales;f__Christensenellaceae;g__Christensenella;s__Christensenella_sp._Marseille-P3954;
s__Clostridium_cochlearium	0.037	Low	High	k__Bacteria;p__Firmicutes;c__Clostridia;o__Clostridiales;f__Clostridiaceae;g__Clostridium;s__Clostridium_cochlearium;
s__Clostridium_tepidiprofundi	0.041	Low	High	k__Bacteria;p__Firmicutes;c__Clostridia;o__Clostridiales;f__Clostridiaceae;g__Clostridium;s__Clostridium_tepidiprofundi;
s__Hungatella_hathewayi	0.003	Low	High	k__Bacteria;p__Firmicutes;c__Clostridia;o__Clostridiales;f__Clostridiaceae;g__Hungatella;s__Hungatella_hathewayi;
s__Acidaminobacter_hydrogenoformans	0.043	Low	High	k__Bacteria;p__Firmicutes;c__Clostridia;o__Clostridiales;f__Clostridiales_Family_XII._Incertae_Sedis;g__Acidaminobacter;s__Acidaminobacter_hydrogenoformans;
s__Emergencia_timonensis	0.008	Low	High	k__Bacteria;p__Firmicutes;c__Clostridia;o__Clostridiales;f__Clostridiales_Family_XIII._Incertae_Sedis;g__Emergencia;s__Emergencia_timonensis;
s__Thermaerobacter_marianensis	0.046	Low	High	k__Bacteria;p__Firmicutes;c__Clostridia;o__Clostridiales;f__Clostridiales_Family_XVII._Incertae_Sedis;g__Thermaerobacter;s__Thermaerobacter_marianensis;
s__Intestinibacillus_massiliensis	0.027	Low	High	k__Bacteria;p__Firmicutes;c__Clostridia;o__Clostridiales;f__Eubacteriaceae;g__Intestinibacillus;s__Intestinibacillus_massiliensis;
s__Anaerostipes_caccae	0.011	High	Low	k__Bacteria;p__Firmicutes;c__Clostridia;o__Clostridiales;f__Lachnospiraceae;g__Anaerostipes;s__Anaerostipes_caccae;
s__Anaerotignum_lactatifermentans	0.037	Low	High	k__Bacteria;p__Firmicutes;c__Clostridia;o__Clostridiales;f__Lachnospiraceae;g__Anaerotignum;s__Anaerotignum_lactatifermentans;
s__Blautia_hydrogenotrophica	0.046	Low	High	k__Bacteria;p__Firmicutes;c__Clostridia;o__Clostridiales;f__Lachnospiraceae;g__Blautia;s__Blautia_hydrogenotrophica;
s__Eisenbergiella_tayi	0.004	Low	High	k__Bacteria;p__Firmicutes;c__Clostridia;o__Clostridiales;f__Lachnospiraceae;g__Eisenbergiella;s__Eisenbergiella_tayi;
s__Clostridium_asparagiforme	0.007	Low	High	k__Bacteria;p__Firmicutes;c__Clostridia;o__Clostridiales;f__Lachnospiraceae;g__Lachnoclostridium;s__Clostridium_asparagiforme;
s__Clostridium_bolteae	0.014	Low	High	k__Bacteria;p__Firmicutes;c__Clostridia;o__Clostridiales;f__Lachnospiraceae;g__Lachnoclostridium;s__Clostridium_bolteae;
s__Clostridium_citroniae	0.004	Low	High	k__Bacteria;p__Firmicutes;c__Clostridia;o__Clostridiales;f__Lachnospiraceae;g__Lachnoclostridium;s__Clostridium_citroniae;
s__Clostridium_symbiosum	0.004	Low	High	k__Bacteria;p__Firmicutes;c__Clostridia;o__Clostridiales;f__Lachnospiraceae;g__Lachnoclostridium;s__Clostridium_symbiosum;
s__Lachnoclostridium_sp._YL32	0.002	Low	High	k__Bacteria;p__Firmicutes;c__Clostridia;o__Clostridiales;f__Lachnospiraceae;g__Lachnoclostridium;s__Lachnoclostridium_sp._YL32;
s__Oribacterium_sinus	0.045	High	Low	k__Bacteria;p__Firmicutes;c__Clostridia;o__Clostridiales;f__Lachnospiraceae;g__Oribacterium;s__Oribacterium_sinus;
s__Oscillibacter_sp._PEA192	0.031	Low	High	k__Bacteria;p__Firmicutes;c__Clostridia;o__Clostridiales;f__Oscillospiraceae;g__Oscillibacter;s__Oscillibacter_sp._PEA192;
s__Desulfallas_alcoholivorax	0.039	Low	High	k__Bacteria;p__Firmicutes;c__Clostridia;o__Clostridiales;f__Peptococcaceae;g__Desulfallas;s__Desulfallas_alcoholivorax;
s__Desulfallas_gibsoniae	0.016	Low	High	k__Bacteria;p__Firmicutes;c__Clostridia;o__Clostridiales;f__Peptococcaceae;g__Desulfallas;s__Desulfallas_gibsoniae;
s__Anaerotruncus_colihominis	0.025	Low	High	k__Bacteria;p__Firmicutes;c__Clostridia;o__Clostridiales;f__Ruminococcaceae;g__Anaerotruncus;s__Anaerotruncus_colihominis;
s__Angelakisella_massiliensis	0.015	Low	High	k__Bacteria;p__Firmicutes;c__Clostridia;o__Clostridiales;f__Ruminococcaceae;g__Angelakisella;s__Angelakisella_massiliensis;
s__Ethanoligenens_harbinense	0.019	High	Low	k__Bacteria;p__Firmicutes;c__Clostridia;o__Clostridiales;f__Ruminococcaceae;g__Ethanoligenens;s__Ethanoligenens_harbinense;
s__Massilimaliae_massiliensis	0.025	Low	High	k__Bacteria;p__Firmicutes;c__Clostridia;o__Clostridiales;f__Ruminococcaceae;g__Massilimaliae;s__Massilimaliae_massiliensis;
s__Ruminococcus_bicirculans	0.045	Low	High	k__Bacteria;p__Firmicutes;c__Clostridia;o__Clostridiales;f__Ruminococcaceae;g__Ruminococcus;s__Ruminococcus_bicirculans;
s__Ruminococcus_bromii	0.011	Low	High	k__Bacteria;p__Firmicutes;c__Clostridia;o__Clostridiales;f__Ruminococcaceae;g__Ruminococcus;s__Ruminococcus_bromii;
s__Ruminococcus_champanellensis	0.035	Low	High	k__Bacteria;p__Firmicutes;c__Clostridia;o__Clostridiales;f__Ruminococcaceae;g__Ruminococcus;s__Ruminococcus_champanellensis;
s__Ruthenibacterium_lactatiformans	0.019	Low	High	k__Bacteria;p__Firmicutes;c__Clostridia;o__Clostridiales;f__Ruminococcaceae;g__Ruthenibacterium;s__Ruthenibacterium_lactatiformans;
s__Subdoligranulum_variabile	0.034	Low	High	k__Bacteria;p__Firmicutes;c__Clostridia;o__Clostridiales;f__Ruminococcaceae;g__Subdoligranulum;s__Subdoligranulum_variabile;
s__Clostridium_leptum	0.044	Low	High	k__Bacteria;p__Firmicutes;c__Clostridia;o__Clostridiales;f__Ruminococcaceae;s__Clostridium_leptum;
s__Clostridium_methylpentosum	0.037	Low	High	k__Bacteria;p__Firmicutes;c__Clostridia;o__Clostridiales;f__Ruminococcaceae;s__Clostridium_methylpentosum;
s__Clostridium_viride	0.034	Low	High	k__Bacteria;p__Firmicutes;c__Clostridia;o__Clostridiales;f__Ruminococcaceae;s__Clostridium_viride;
s__Eubacterium_siraeum	0.034	Low	High	k__Bacteria;p__Firmicutes;c__Clostridia;o__Clostridiales;f__Ruminococcaceae;s__Eubacterium_siraeum;
s__Intestinimonas_butyriciproducens	0.03	Low	High	k__Bacteria;p__Firmicutes;c__Clostridia;o__Clostridiales;g__Intestinimonas;s__Intestinimonas_butyriciproducens;
s__Clostridiales_bacterium_CCNA10	0.024	Low	High	k__Bacteria;p__Firmicutes;c__Clostridia;o__Clostridiales;s__Clostridiales_bacterium_CCNA10;
s__Holdemania_massiliensis	0.031	Low	High	k__Bacteria;p__Firmicutes;c__Erysipelotrichia;o__Erysipelotrichales;f__Erysipelotrichaceae;g__Holdemania;s__Holdemania_massiliensis;
s__Kandleria_vitulina	0.003	High	Low	k__Bacteria;p__Firmicutes;c__Erysipelotrichia;o__Erysipelotrichales;f__Erysipelotrichaceae;g__Kandleria;s__Kandleria_vitulina;
s__Murdochiella_massiliensis	0.033	Low	High	k__Bacteria;p__Firmicutes;c__Tissierellia;o__Tissierellales;f__Peptoniphilaceae;g__Murdochiella;s__Murdochiella_massiliensis;
s__Peptoniphilus_urinimassiliensis	0.037	Low	High	k__Bacteria;p__Firmicutes;c__Tissierellia;o__Tissierellales;f__Peptoniphilaceae;g__Peptoniphilus;s__Peptoniphilus_urinimassiliensis;
s__Ndongobacter_massiliensis	0.019	Low	High	k__Bacteria;p__Firmicutes;g__Ndongobacter;s__Ndongobacter_massiliensis;
s__endosymbiont_'TC1'_of_Trimyema_compressum	0.03	High	Low	k__Bacteria;p__Firmicutes;s__endosymbiont_'TC1'_of_Trimyema_compressum;
s__Fusobacterium_mortiferum	0.006	High	Low	k__Bacteria;p__Fusobacteria;c__Fusobacteriia;o__Fusobacteriales;f__Fusobacteriaceae;g__Fusobacterium;s__Fusobacterium_mortiferum;
s__Methylobacterium_sp._DM1	0.034	Low	High	k__Bacteria;p__Proteobacteria;c__Alphaproteobacteria;o__Rhizobiales;f__Methylobacteriaceae;g__Methylobacterium;s__Methylobacterium_sp._DM1;
s__Acidovorax_caeni	0.028	Low	High	k__Bacteria;p__Proteobacteria;c__Betaproteobacteria;o__Burkholderiales;f__Comamonadaceae;g__Acidovorax;s__Acidovorax_caeni;
s__Eikenella_corrodens	0.011	High	Low	k__Bacteria;p__Proteobacteria;c__Betaproteobacteria;o__Neisseriales;f__Neisseriaceae;g__Eikenella;s__Eikenella_corrodens;
s__Kingella_denitrificans	0.043	High	Low	k__Bacteria;p__Proteobacteria;c__Betaproteobacteria;o__Neisseriales;f__Neisseriaceae;g__Kingella;s__Kingella_denitrificans;
s__Kingella_oralis	0.047	High	Low	k__Bacteria;p__Proteobacteria;c__Betaproteobacteria;o__Neisseriales;f__Neisseriaceae;g__Kingella;s__Kingella_oralis;
s__Neisseria_elongata	0.024	High	Low	k__Bacteria;p__Proteobacteria;c__Betaproteobacteria;o__Neisseriales;f__Neisseriaceae;g__Neisseria;s__Neisseria_elongata;
s__Desulfovibrio_hydrothermalis	0.028	High	Low	k__Bacteria;p__Proteobacteria;c__Deltaproteobacteria;o__Desulfovibrionales;f__Desulfovibrionaceae;g__Desulfovibrio;s__Desulfovibrio_hydrothermalis;
s__Desulfovibrio_sp._G11	0.029	Low	High	k__Bacteria;p__Proteobacteria;c__Deltaproteobacteria;o__Desulfovibrionales;f__Desulfovibrionaceae;g__Desulfovibrio;s__Desulfovibrio_sp._G11;
s__Buttiauxella_sp._3AFRM03	0.044	High	Low	k__Bacteria;p__Proteobacteria;c__Gammaproteobacteria;o__Enterobacterales;f__Enterobacteriaceae;g__Buttiauxella;s__Buttiauxella_sp._3AFRM03;
s__Candidatus_Hamiltonella_defensa	0.006	High	Low	k__Bacteria;p__Proteobacteria;c__Gammaproteobacteria;o__Enterobacterales;f__Enterobacteriaceae;g__Candidatus_Hamiltonella;s__Candidatus_Hamiltonella_defensa;
s__Candidatus_Ishikawaella_capsulata	0.006	High	Low	k__Bacteria;p__Proteobacteria;c__Gammaproteobacteria;o__Enterobacterales;f__Enterobacteriaceae;g__Candidatus_Ishikawaella;s__Candidatus_Ishikawaella_capsulata;
s__Leclercia_adecarboxylata	0.047	High	Low	k__Bacteria;p__Proteobacteria;c__Gammaproteobacteria;o__Enterobacterales;f__Enterobacteriaceae;g__Leclercia;s__Leclercia_adecarboxylata;
s__Leclercia_sp._LSNIH1	0.045	High	Low	k__Bacteria;p__Proteobacteria;c__Gammaproteobacteria;o__Enterobacterales;f__Enterobacteriaceae;g__Leclercia;s__Leclercia_sp._LSNIH1;
s__Leclercia_sp._LSNIH3	0.028	High	Low	k__Bacteria;p__Proteobacteria;c__Gammaproteobacteria;o__Enterobacterales;f__Enterobacteriaceae;g__Leclercia;s__Leclercia_sp._LSNIH3;
s__Haemophilus_haemolyticus	0.044	High	Low	k__Bacteria;p__Proteobacteria;c__Gammaproteobacteria;o__Pasteurellales;f__Pasteurellaceae;g__Haemophilus;s__Haemophilus_haemolyticus;
s__Haemophilus_parainfluenzae	0.045	High	Low	k__Bacteria;p__Proteobacteria;c__Gammaproteobacteria;o__Pasteurellales;f__Pasteurellaceae;g__Haemophilus;s__Haemophilus_parainfluenzae;
s__Rodentibacter_heylii	0.028	High	Low	k__Bacteria;p__Proteobacteria;c__Gammaproteobacteria;o__Pasteurellales;f__Pasteurellaceae;g__Rodentibacter;s__Rodentibacter_heylii;
s__Pseudomonas_aeruginosa	0.008	High	Low	k__Bacteria;p__Proteobacteria;c__Gammaproteobacteria;o__Pseudomonadales;f__Pseudomonadaceae;g__Pseudomonas;s__Pseudomonas_aeruginosa;
s__Cloacibacillus_porcorum	0.009	Low	High	k__Bacteria;p__Synergistetes;c__Synergistia;o__Synergistales;f__Synergistaceae;g__Cloacibacillus;s__Cloacibacillus_porcorum;
s__Akkermansia_glycaniphila	0.011	Low	High	k__Bacteria;p__Verrucomicrobia;c__Verrucomicrobiae;o__Verrucomicrobiales;f__Akkermansiaceae;g__Akkermansia;s__Akkermansia_glycaniphila;
s__Akkermansia_muciniphila	0.018	Low	High	k__Bacteria;p__Verrucomicrobia;c__Verrucomicrobiae;o__Verrucomicrobiales;f__Akkermansiaceae;g__Akkermansia;s__Akkermansia_muciniphila;

## Sheet: Table S3. BTC
Taxonomy	Wilcoxon_Pvalue	BTC_CBR_group	BTC_NCB_group	Taxonomy_detail
p__Bacteroidetes	0.00343492	High	Low	k__Bacteria;p__Bacteroidetes;
c__Bacteroidia	0.00343492	High	Low	k__Bacteria;p__Bacteroidetes;c__Bacteroidia;
c__Cytophagia	0.0238911	High	Low	k__Bacteria;p__Bacteroidetes;c__Cytophagia;
o__Bacteroidales	0.00343492	High	Low	k__Bacteria;p__Bacteroidetes;c__Bacteroidia;o__Bacteroidales;
o__Cytophagales	0.0238911	High	Low	k__Bacteria;p__Bacteroidetes;c__Cytophagia;o__Cytophagales;
o__Synechococcales	0.0279768	High	Low	k__Bacteria;p__Cyanobacteria;o__Synechococcales;
o__Cardiobacteriales	0.038516	High	Low	k__Bacteria;p__Proteobacteria;c__Gammaproteobacteria;o__Cardiobacteriales;
o__Enterobacterales	0.0360109	Low	High	k__Bacteria;p__Proteobacteria;c__Gammaproteobacteria;o__Enterobacterales;
o__Pasteurellales	0.0341623	High	Low	k__Bacteria;p__Proteobacteria;c__Gammaproteobacteria;o__Pasteurellales;
f__Cellulomonadaceae	0.0466138	High	Low	k__Bacteria;p__Actinobacteria;c__Actinobacteria;o__Micrococcales;f__Cellulomonadaceae;
f__Atopobiaceae	0.0330217	Low	High	k__Bacteria;p__Actinobacteria;c__Coriobacteriia;o__Coriobacteriales;f__Atopobiaceae;
f__Paludibacteraceae	0.011687	High	Low	k__Bacteria;p__Bacteroidetes;c__Bacteroidia;o__Bacteroidales;f__Paludibacteraceae;
f__Marinilabiliaceae	0.0194108	High	Low	k__Bacteria;p__Bacteroidetes;c__Bacteroidia;o__Marinilabiliales;f__Marinilabiliaceae;
f__Cyclobacteriaceae	0.0272646	High	Low	k__Bacteria;p__Bacteroidetes;c__Cytophagia;o__Cytophagales;f__Cyclobacteriaceae;
f__Microcoleaceae	0.0428895	High	Low	k__Bacteria;p__Cyanobacteria;o__Oscillatoriales;f__Microcoleaceae;
f__Prochlorotrichaceae	0.0428895	High	Low	k__Bacteria;p__Cyanobacteria;o__Synechococcales;f__Prochlorotrichaceae;
f__Burkholderiaceae	0.0334737	High	Low	k__Bacteria;p__Proteobacteria;c__Betaproteobacteria;o__Burkholderiales;f__Burkholderiaceae;
f__Methylophilaceae	0.0398353	High	Low	k__Bacteria;p__Proteobacteria;c__Betaproteobacteria;o__Nitrosomonadales;f__Methylophilaceae;
f__Pseudoalteromonadaceae	0.0249017	High	Low	k__Bacteria;p__Proteobacteria;c__Gammaproteobacteria;o__Alteromonadales;f__Pseudoalteromonadaceae;
f__Cardiobacteriaceae	0.038516	High	Low	k__Bacteria;p__Proteobacteria;c__Gammaproteobacteria;o__Cardiobacteriales;f__Cardiobacteriaceae;
f__Ectothiorhodospiraceae	0.0428895	High	Low	k__Bacteria;p__Proteobacteria;c__Gammaproteobacteria;o__Chromatiales;f__Ectothiorhodospiraceae;
f__Enterobacteriaceae	0.0360109	Low	High	k__Bacteria;p__Proteobacteria;c__Gammaproteobacteria;o__Enterobacterales;f__Enterobacteriaceae;
f__Erwiniaceae	0.0446559	Low	High	k__Bacteria;p__Proteobacteria;c__Gammaproteobacteria;o__Enterobacterales;f__Erwiniaceae;
f__Pectobacteriaceae	0.0151952	Low	High	k__Bacteria;p__Proteobacteria;c__Gammaproteobacteria;o__Enterobacterales;f__Pectobacteriaceae;
f__Pasteurellaceae	0.0341623	High	Low	k__Bacteria;p__Proteobacteria;c__Gammaproteobacteria;o__Pasteurellales;f__Pasteurellaceae;
g__Scardovia	0.0442337	Low	High	k__Bacteria;p__Actinobacteria;c__Actinobacteria;o__Bifidobacteriales;f__Bifidobacteriaceae;g__Scardovia;
g__Cellulomonas	0.0466138	High	Low	k__Bacteria;p__Actinobacteria;c__Actinobacteria;o__Micrococcales;f__Cellulomonadaceae;g__Cellulomonas;
g__Cutibacterium	0.00554921	Low	High	k__Bacteria;p__Actinobacteria;c__Actinobacteria;o__Propionibacteriales;f__Propionibacteriaceae;g__Cutibacterium;
g__Proteiniphilum	0.0429251	Low	High	k__Bacteria;p__Bacteroidetes;c__Bacteroidia;o__Bacteroidales;f__Dysgonamonadaceae;g__Proteiniphilum;
g__Paludibacter	0.011687	High	Low	k__Bacteria;p__Bacteroidetes;c__Bacteroidia;o__Bacteroidales;f__Paludibacteraceae;g__Paludibacter;
g__Petrimonas	0.0162338	High	Low	k__Bacteria;p__Bacteroidetes;c__Bacteroidia;o__Bacteroidales;f__Porphyromonadaceae;g__Petrimonas;
g__Prevotellamassilia	0.00850867	High	Low	k__Bacteria;p__Bacteroidetes;c__Bacteroidia;o__Bacteroidales;f__Prevotellaceae;g__Prevotellamassilia;
g__Aquimarina	0.00869608	High	Low	k__Bacteria;p__Bacteroidetes;c__Flavobacteriia;o__Flavobacteriales;f__Flavobacteriaceae;g__Aquimarina;
g__Nodosilinea	0.0428895	High	Low	k__Bacteria;p__Cyanobacteria;o__Synechococcales;f__Prochlorotrichaceae;g__Nodosilinea;
g__Pontibacillus	0.0388278	High	Low	k__Bacteria;p__Firmicutes;c__Bacilli;o__Bacillales;f__Bacillaceae;g__Pontibacillus;
g__Carnobacterium	0.022747	Low	High	k__Bacteria;p__Firmicutes;c__Bacilli;o__Lactobacillales;f__Carnobacteriaceae;g__Carnobacterium;
g__Caloranaerobacter	0.044995	High	Low	k__Bacteria;p__Firmicutes;c__Clostridia;o__Clostridiales;f__Clostridiaceae;g__Caloranaerobacter;
g__Hathewaya	0.031009	High	Low	k__Bacteria;p__Firmicutes;c__Clostridia;o__Clostridiales;f__Clostridiaceae;g__Hathewaya;
g__Acetitomaculum	0.0276592	Low	High	k__Bacteria;p__Firmicutes;c__Clostridia;o__Clostridiales;f__Lachnospiraceae;g__Acetitomaculum;
g__Filifactor	0.0274252	Low	High	k__Bacteria;p__Firmicutes;c__Clostridia;o__Clostridiales;f__Peptostreptococcaceae;g__Filifactor;
g__Ezakiella	0.0427278	Low	High	k__Bacteria;p__Firmicutes;c__Tissierellia;g__Ezakiella;
g__Urinacoccus	0.0402372	Low	High	k__Bacteria;p__Firmicutes;c__Tissierellia;o__Tissierellales;f__Peptoniphilaceae;g__Urinacoccus;
g__Lautropia	0.001	High	Low	k__Bacteria;p__Proteobacteria;c__Betaproteobacteria;o__Burkholderiales;f__Burkholderiaceae;g__Lautropia;
g__Simonsiella	0.0428895	High	Low	k__Bacteria;p__Proteobacteria;c__Betaproteobacteria;o__Neisseriales;f__Neisseriaceae;g__Simonsiella;
g__Pseudoalteromonas	0.0249017	High	Low	k__Bacteria;p__Proteobacteria;c__Gammaproteobacteria;o__Alteromonadales;f__Pseudoalteromonadaceae;g__Pseudoalteromonas;
g__Franconibacter	0.0457118	Low	High	k__Bacteria;p__Proteobacteria;c__Gammaproteobacteria;o__Enterobacterales;f__Enterobacteriaceae;g__Franconibacter;
g__Gibbsiella	0.0403582	Low	High	k__Bacteria;p__Proteobacteria;c__Gammaproteobacteria;o__Enterobacterales;f__Enterobacteriaceae;g__Gibbsiella;
g__Yokenella	0.0251155	Low	High	k__Bacteria;p__Proteobacteria;c__Gammaproteobacteria;o__Enterobacterales;f__Enterobacteriaceae;g__Yokenella;
g__Pantoea	0.030498	Low	High	k__Bacteria;p__Proteobacteria;c__Gammaproteobacteria;o__Enterobacterales;f__Erwiniaceae;g__Pantoea;
g__Dickeya	0.0429392	Low	High	k__Bacteria;p__Proteobacteria;c__Gammaproteobacteria;o__Enterobacterales;f__Pectobacteriaceae;g__Dickeya;
g__Pectobacterium	0.0437617	Low	High	k__Bacteria;p__Proteobacteria;c__Gammaproteobacteria;o__Enterobacterales;f__Pectobacteriaceae;g__Pectobacterium;
g__Haemophilus	0.0117879	High	Low	k__Bacteria;p__Proteobacteria;c__Gammaproteobacteria;o__Pasteurellales;f__Pasteurellaceae;g__Haemophilus;
s__Bifidobacterium_crudilactis	0.0427278	Low	High	k__Bacteria;p__Actinobacteria;c__Actinobacteria;o__Bifidobacteriales;f__Bifidobacteriaceae;g__Bifidobacterium;s__Bifidobacterium_crudilactis;
s__Bifidobacterium_cuniculi	0.0392385	Low	High	k__Bacteria;p__Actinobacteria;c__Actinobacteria;o__Bifidobacteriales;f__Bifidobacteriaceae;g__Bifidobacterium;s__Bifidobacterium_cuniculi;
s__Bifidobacterium_gallicum	0.0254651	Low	High	k__Bacteria;p__Actinobacteria;c__Actinobacteria;o__Bifidobacteriales;f__Bifidobacteriaceae;g__Bifidobacterium;s__Bifidobacterium_gallicum;
s__Bifidobacterium_magnum	0.0144678	Low	High	k__Bacteria;p__Actinobacteria;c__Actinobacteria;o__Bifidobacteriales;f__Bifidobacteriaceae;g__Bifidobacterium;s__Bifidobacterium_magnum;
s__Bifidobacterium_pseudolongum	0.00627971	Low	High	k__Bacteria;p__Actinobacteria;c__Actinobacteria;o__Bifidobacteriales;f__Bifidobacteriaceae;g__Bifidobacterium;s__Bifidobacterium_pseudolongum;
s__Bifidobacterium_psychraerophilum	0.0427278	Low	High	k__Bacteria;p__Actinobacteria;c__Actinobacteria;o__Bifidobacteriales;f__Bifidobacteriaceae;g__Bifidobacterium;s__Bifidobacterium_psychraerophilum;
s__Bifidobacterium_scardovii	0.0171529	Low	High	k__Bacteria;p__Actinobacteria;c__Actinobacteria;o__Bifidobacteriales;f__Bifidobacteriaceae;g__Bifidobacterium;s__Bifidobacterium_scardovii;
s__Cellulomonas_carbonis	0.0466138	High	Low	k__Bacteria;p__Actinobacteria;c__Actinobacteria;o__Micrococcales;f__Cellulomonadaceae;g__Cellulomonas;s__Cellulomonas_carbonis;
s__Cutibacterium_acnes	0.0114376	Low	High	k__Bacteria;p__Actinobacteria;c__Actinobacteria;o__Propionibacteriales;f__Propionibacteriaceae;g__Cutibacterium;s__Cutibacterium_acnes;
s__Atopobium_parvulum	0.00641573	Low	High	k__Bacteria;p__Actinobacteria;c__Coriobacteriia;o__Coriobacteriales;f__Atopobiaceae;g__Atopobium;s__Atopobium_parvulum;
s__Olsenella_profusa	0.0158116	Low	High	k__Bacteria;p__Actinobacteria;c__Coriobacteriia;o__Coriobacteriales;f__Atopobiaceae;g__Olsenella;s__Olsenella_profusa;
s__Bacteroides_barnesiae	0.0330217	High	Low	k__Bacteria;p__Bacteroidetes;c__Bacteroidia;o__Bacteroidales;f__Bacteroidaceae;g__Bacteroides;s__Bacteroides_barnesiae;
s__Bacteroides_coprophilus	0.0276592	High	Low	k__Bacteria;p__Bacteroidetes;c__Bacteroidia;o__Bacteroidales;f__Bacteroidaceae;g__Bacteroides;s__Bacteroides_coprophilus;
s__Bacteroides_coprosuis	0.0171489	High	Low	k__Bacteria;p__Bacteroidetes;c__Bacteroidia;o__Bacteroidales;f__Bacteroidaceae;g__Bacteroides;s__Bacteroides_coprosuis;
s__Bacteroides_fluxus	0.00435201	High	Low	k__Bacteria;p__Bacteroidetes;c__Bacteroidia;o__Bacteroidales;f__Bacteroidaceae;g__Bacteroides;s__Bacteroides_fluxus;
s__Bacteroides_plebeius	0.0302415	High	Low	k__Bacteria;p__Bacteroidetes;c__Bacteroidia;o__Bacteroidales;f__Bacteroidaceae;g__Bacteroides;s__Bacteroides_plebeius;
s__Bacteroides_stercoris	0.0157386	High	Low	k__Bacteria;p__Bacteroidetes;c__Bacteroidia;o__Bacteroidales;f__Bacteroidaceae;g__Bacteroides;s__Bacteroides_stercoris;
s__Proteiniphilum_saccharofermentans	0.0429251	Low	High	k__Bacteria;p__Bacteroidetes;c__Bacteroidia;o__Bacteroidales;f__Dysgonamonadaceae;g__Proteiniphilum;s__Proteiniphilum_saccharofermentans;
s__Paludibacter_jiangxiensis	0.00710687	High	Low	k__Bacteria;p__Bacteroidetes;c__Bacteroidia;o__Bacteroidales;f__Paludibacteraceae;g__Paludibacter;s__Paludibacter_jiangxiensis;
s__Paludibacter_propionicigenes	0.0238917	High	Low	k__Bacteria;p__Bacteroidetes;c__Bacteroidia;o__Bacteroidales;f__Paludibacteraceae;g__Paludibacter;s__Paludibacter_propionicigenes;
s__Petrimonas_mucosa	0.0162338	High	Low	k__Bacteria;p__Bacteroidetes;c__Bacteroidia;o__Bacteroidales;f__Porphyromonadaceae;g__Petrimonas;s__Petrimonas_mucosa;
s__Prevotella_aff._ruminicola_Tc2-24	0.0209079	High	Low	k__Bacteria;p__Bacteroidetes;c__Bacteroidia;o__Bacteroidales;f__Prevotellaceae;g__Prevotella;s__Prevotella_aff._ruminicola_Tc2-24;
s__Prevotella_shahii	0.0447864	High	Low	k__Bacteria;p__Bacteroidetes;c__Bacteroidia;o__Bacteroidales;f__Prevotellaceae;g__Prevotella;s__Prevotella_shahii;
s__Prevotellamassilia_timonensis	0.00850867	High	Low	k__Bacteria;p__Bacteroidetes;c__Bacteroidia;o__Bacteroidales;f__Prevotellaceae;g__Prevotellamassilia;s__Prevotellamassilia_timonensis;
s__Alistipes_inops	0.0315076	High	Low	k__Bacteria;p__Bacteroidetes;c__Bacteroidia;o__Bacteroidales;f__Rikenellaceae;g__Alistipes;s__Alistipes_inops;
s__Alistipes_putredinis	0.0302415	High	Low	k__Bacteria;p__Bacteroidetes;c__Bacteroidia;o__Bacteroidales;f__Rikenellaceae;g__Alistipes;s__Alistipes_putredinis;
s__Alistipes_shahii	0.0360109	High	Low	k__Bacteria;p__Bacteroidetes;c__Bacteroidia;o__Bacteroidales;f__Rikenellaceae;g__Alistipes;s__Alistipes_shahii;
s__Alistipes_timonensis	0.00973382	High	Low	k__Bacteria;p__Bacteroidetes;c__Bacteroidia;o__Bacteroidales;f__Rikenellaceae;g__Alistipes;s__Alistipes_timonensis;
s__Chitinophaga_eiseniae	0.0428895	High	Low	k__Bacteria;p__Bacteroidetes;c__Chitinophagia;o__Chitinophagales;f__Chitinophagaceae;g__Chitinophaga;s__Chitinophaga_eiseniae;
s__Nodosilinea_nodulosa	0.0428895	High	Low	k__Bacteria;p__Cyanobacteria;o__Synechococcales;f__Prochlorotrichaceae;g__Nodosilinea;s__Nodosilinea_nodulosa;
s__Bacillus_eiseniae	0.0428895	High	Low	k__Bacteria;p__Firmicutes;c__Bacilli;o__Bacillales;f__Bacillaceae;g__Bacillus;s__Bacillus_eiseniae;
s__Pontibacillus_litoralis	0.0388278	High	Low	k__Bacteria;p__Firmicutes;c__Bacilli;o__Bacillales;f__Bacillaceae;g__Pontibacillus;s__Pontibacillus_litoralis;
s__Paenibacillus_ihbetae	0.0428895	High	Low	k__Bacteria;p__Firmicutes;c__Bacilli;o__Bacillales;f__Paenibacillaceae;g__Paenibacillus;s__Paenibacillus_ihbetae;
s__Paenibacillus_tuaregi	0.0180581	High	Low	k__Bacteria;p__Firmicutes;c__Bacilli;o__Bacillales;f__Paenibacillaceae;g__Paenibacillus;s__Paenibacillus_tuaregi;
s__Staphylococcus_pseudintermedius	0.00545282	Low	High	k__Bacteria;p__Firmicutes;c__Bacilli;o__Bacillales;f__Staphylococcaceae;g__Staphylococcus;s__Staphylococcus_pseudintermedius;
s__Carnobacterium_gallinarum	0.0437617	Low	High	k__Bacteria;p__Firmicutes;c__Bacilli;o__Lactobacillales;f__Carnobacteriaceae;g__Carnobacterium;s__Carnobacterium_gallinarum;
s__Enterococcus_faecalis	0.00334678	Low	High	k__Bacteria;p__Firmicutes;c__Bacilli;o__Lactobacillales;f__Enterococcaceae;g__Enterococcus;s__Enterococcus_faecalis;
s__Enterococcus_gallinarum	0.023917	Low	High	k__Bacteria;p__Firmicutes;c__Bacilli;o__Lactobacillales;f__Enterococcaceae;g__Enterococcus;s__Enterococcus_gallinarum;
s__Enterococcus_sp._CR-Ec1	0.023917	Low	High	k__Bacteria;p__Firmicutes;c__Bacilli;o__Lactobacillales;f__Enterococcaceae;g__Enterococcus;s__Enterococcus_sp._CR-Ec1;
s__Lactobacillus_amylovorus	0.00701693	Low	High	k__Bacteria;p__Firmicutes;c__Bacilli;o__Lactobacillales;f__Lactobacillaceae;g__Lactobacillus;s__Lactobacillus_amylovorus;
s__Lactobacillus_backii	0.0427278	Low	High	k__Bacteria;p__Firmicutes;c__Bacilli;o__Lactobacillales;f__Lactobacillaceae;g__Lactobacillus;s__Lactobacillus_backii;
s__Lactobacillus_brevis	0.0470769	Low	High	k__Bacteria;p__Firmicutes;c__Bacilli;o__Lactobacillales;f__Lactobacillaceae;g__Lactobacillus;s__Lactobacillus_brevis;
s__Lactobacillus_casei	0.0427278	Low	High	k__Bacteria;p__Firmicutes;c__Bacilli;o__Lactobacillales;f__Lactobacillaceae;g__Lactobacillus;s__Lactobacillus_casei;
s__Lactobacillus_fermentum	0.0388709	Low	High	k__Bacteria;p__Firmicutes;c__Bacilli;o__Lactobacillales;f__Lactobacillaceae;g__Lactobacillus;s__Lactobacillus_fermentum;
s__Lactobacillus_helveticus	0.0190359	Low	High	k__Bacteria;p__Firmicutes;c__Bacilli;o__Lactobacillales;f__Lactobacillaceae;g__Lactobacillus;s__Lactobacillus_helveticus;
s__Lactobacillus_hominis	0.0427278	Low	High	k__Bacteria;p__Firmicutes;c__Bacilli;o__Lactobacillales;f__Lactobacillaceae;g__Lactobacillus;s__Lactobacillus_hominis;
s__Lactobacillus_paracasei	0.0152588	Low	High	k__Bacteria;p__Firmicutes;c__Bacilli;o__Lactobacillales;f__Lactobacillaceae;g__Lactobacillus;s__Lactobacillus_paracasei;
s__Lactobacillus_rhamnosus	0.00365235	Low	High	k__Bacteria;p__Firmicutes;c__Bacilli;o__Lactobacillales;f__Lactobacillaceae;g__Lactobacillus;s__Lactobacillus_rhamnosus;
s__Lactobacillus_sanfranciscensis	0.0475073	Low	High	k__Bacteria;p__Firmicutes;c__Bacilli;o__Lactobacillales;f__Lactobacillaceae;g__Lactobacillus;s__Lactobacillus_sanfranciscensis;
s__Lactobacillus_vaginalis	0.0143093	Low	High	k__Bacteria;p__Firmicutes;c__Bacilli;o__Lactobacillales;f__Lactobacillaceae;g__Lactobacillus;s__Lactobacillus_vaginalis;
s__Streptococcus_iniae	0.0466138	Low	High	k__Bacteria;p__Firmicutes;c__Bacilli;o__Lactobacillales;f__Streptococcaceae;g__Streptococcus;s__Streptococcus_iniae;
s__Caloranaerobacter_ferrireducens	0.044995	High	Low	k__Bacteria;p__Firmicutes;c__Clostridia;o__Clostridiales;f__Clostridiaceae;g__Caloranaerobacter;s__Caloranaerobacter_ferrireducens;
s__Hathewaya_proteolytica	0.031009	High	Low	k__Bacteria;p__Firmicutes;c__Clostridia;o__Clostridiales;f__Clostridiaceae;g__Hathewaya;s__Hathewaya_proteolytica;
s__Acetitomaculum_ruminis	0.0276592	Low	High	k__Bacteria;p__Firmicutes;c__Clostridia;o__Clostridiales;f__Lachnospiraceae;g__Acetitomaculum;s__Acetitomaculum_ruminis;
s__Anaerostipes_caccae	0.0360109	Low	High	k__Bacteria;p__Firmicutes;c__Clostridia;o__Clostridiales;f__Lachnospiraceae;g__Anaerostipes;s__Anaerostipes_caccae;
s__Desulfitobacterium_dichloroeliminans	0.0428895	High	Low	k__Bacteria;p__Firmicutes;c__Clostridia;o__Clostridiales;f__Peptococcaceae;g__Desulfitobacterium;s__Desulfitobacterium_dichloroeliminans;
s__Filifactor_alocis	0.0274252	Low	High	k__Bacteria;p__Firmicutes;c__Clostridia;o__Clostridiales;f__Peptostreptococcaceae;g__Filifactor;s__Filifactor_alocis;
s__Fenollaria_timonensis	0.022747	Low	High	k__Bacteria;p__Firmicutes;c__Clostridia;o__Clostridiales;g__Fenollaria;s__Fenollaria_timonensis;
s__Megasphaera_genomosp._type_1	0.00370546	Low	High	k__Bacteria;p__Firmicutes;c__Negativicutes;o__Veillonellales;f__Veillonellaceae;g__Megasphaera;s__Megasphaera_genomosp._type_1;
s__Ezakiella_massiliensis	0.0427278	Low	High	k__Bacteria;p__Firmicutes;c__Tissierellia;g__Ezakiella;s__Ezakiella_massiliensis;
s__Anaerococcus_provencensis	0.0427278	Low	High	k__Bacteria;p__Firmicutes;c__Tissierellia;o__Tissierellales;f__Peptoniphilaceae;g__Anaerococcus;s__Anaerococcus_provencensis;
s__Anaerococcus_tetradius	0.0427278	Low	High	k__Bacteria;p__Firmicutes;c__Tissierellia;o__Tissierellales;f__Peptoniphilaceae;g__Anaerococcus;s__Anaerococcus_tetradius;
s__Peptoniphilus_obesi	0.0131139	Low	High	k__Bacteria;p__Firmicutes;c__Tissierellia;o__Tissierellales;f__Peptoniphilaceae;g__Peptoniphilus;s__Peptoniphilus_obesi;
s__Peptoniphilus_rhinitidis	0.0427278	Low	High	k__Bacteria;p__Firmicutes;c__Tissierellia;o__Tissierellales;f__Peptoniphilaceae;g__Peptoniphilus;s__Peptoniphilus_rhinitidis;
s__Peptoniphilus_timonensis	0.0238941	Low	High	k__Bacteria;p__Firmicutes;c__Tissierellia;o__Tissierellales;f__Peptoniphilaceae;g__Peptoniphilus;s__Peptoniphilus_timonensis;
s__Urinacoccus_massiliensis	0.0402372	Low	High	k__Bacteria;p__Firmicutes;c__Tissierellia;o__Tissierellales;f__Peptoniphilaceae;g__Urinacoccus;s__Urinacoccus_massiliensis;
s__Lautropia_mirabilis	0.001	High	Low	k__Bacteria;p__Proteobacteria;c__Betaproteobacteria;o__Burkholderiales;f__Burkholderiaceae;g__Lautropia;s__Lautropia_mirabilis;
s__Kingella_oralis	0.0428895	High	Low	k__Bacteria;p__Proteobacteria;c__Betaproteobacteria;o__Neisseriales;f__Neisseriaceae;g__Kingella;s__Kingella_oralis;
s__Simonsiella_muelleri	0.0428895	High	Low	k__Bacteria;p__Proteobacteria;c__Betaproteobacteria;o__Neisseriales;f__Neisseriaceae;g__Simonsiella;s__Simonsiella_muelleri;
s__Campylobacter_concisus	0.0067487	High	Low	k__Bacteria;p__Proteobacteria;c__Epsilonproteobacteria;o__Campylobacterales;f__Campylobacteraceae;g__Campylobacter;s__Campylobacter_concisus;
s__Cardiobacterium_hominis	0.0317531	High	Low	k__Bacteria;p__Proteobacteria;c__Gammaproteobacteria;o__Cardiobacteriales;f__Cardiobacteriaceae;g__Cardiobacterium;s__Cardiobacterium_hominis;
s__Citrobacter_amalonaticus	0.0191532	Low	High	k__Bacteria;p__Proteobacteria;c__Gammaproteobacteria;o__Enterobacterales;f__Enterobacteriaceae;g__Citrobacter;s__Citrobacter_amalonaticus;
s__Citrobacter_farmeri	0.0298016	Low	High	k__Bacteria;p__Proteobacteria;c__Gammaproteobacteria;o__Enterobacterales;f__Enterobacteriaceae;g__Citrobacter;s__Citrobacter_farmeri;
s__Citrobacter_rodentium	0.049577	Low	High	k__Bacteria;p__Proteobacteria;c__Gammaproteobacteria;o__Enterobacterales;f__Enterobacteriaceae;g__Citrobacter;s__Citrobacter_rodentium;
s__Enterobacter_cloacae	0.0338483	Low	High	k__Bacteria;p__Proteobacteria;c__Gammaproteobacteria;o__Enterobacterales;f__Enterobacteriaceae;g__Enterobacter;s__Enterobacter_cloacae;
s__Enterobacter_cloacae_complex_sp._ECNIH7	0.0403582	Low	High	k__Bacteria;p__Proteobacteria;c__Gammaproteobacteria;o__Enterobacterales;f__Enterobacteriaceae;g__Enterobacter;s__Enterobacter_cloacae_complex_sp._ECNIH7;
s__Franconibacter_pulveris	0.0457118	Low	High	k__Bacteria;p__Proteobacteria;c__Gammaproteobacteria;o__Enterobacterales;f__Enterobacteriaceae;g__Franconibacter;s__Franconibacter_pulveris;
s__Gibbsiella_quercinecans	0.0403582	Low	High	k__Bacteria;p__Proteobacteria;c__Gammaproteobacteria;o__Enterobacterales;f__Enterobacteriaceae;g__Gibbsiella;s__Gibbsiella_quercinecans;
s__Klebsiella_oxytoca	0.0165084	Low	High	k__Bacteria;p__Proteobacteria;c__Gammaproteobacteria;o__Enterobacterales;f__Enterobacteriaceae;g__Klebsiella;s__Klebsiella_oxytoca;
s__Klebsiella_quasipneumoniae	0.038692	Low	High	k__Bacteria;p__Proteobacteria;c__Gammaproteobacteria;o__Enterobacterales;f__Enterobacteriaceae;g__Klebsiella;s__Klebsiella_quasipneumoniae;
s__Klebsiella_quasivariicola	0.0310972	Low	High	k__Bacteria;p__Proteobacteria;c__Gammaproteobacteria;o__Enterobacterales;f__Enterobacteriaceae;g__Klebsiella;s__Klebsiella_quasivariicola;
s__Klebsiella_sp._FDAARGOS_511	0.00465612	Low	High	k__Bacteria;p__Proteobacteria;c__Gammaproteobacteria;o__Enterobacterales;f__Enterobacteriaceae;g__Klebsiella;s__Klebsiella_sp._FDAARGOS_511;
s__Klebsiella_sp._M5al	0.00244756	Low	High	k__Bacteria;p__Proteobacteria;c__Gammaproteobacteria;o__Enterobacterales;f__Enterobacteriaceae;g__Klebsiella;s__Klebsiella_sp._M5al;
s__Klebsiella_sp._P1CD1	0.0336076	Low	High	k__Bacteria;p__Proteobacteria;c__Gammaproteobacteria;o__Enterobacterales;f__Enterobacteriaceae;g__Klebsiella;s__Klebsiella_sp._P1CD1;
s__Kosakonia_radicincitans	0.0318614	Low	High	k__Bacteria;p__Proteobacteria;c__Gammaproteobacteria;o__Enterobacterales;f__Enterobacteriaceae;g__Kosakonia;s__Kosakonia_radicincitans;
s__Salmonella_bongori	0.0457118	Low	High	k__Bacteria;p__Proteobacteria;c__Gammaproteobacteria;o__Enterobacterales;f__Enterobacteriaceae;g__Salmonella;s__Salmonella_bongori;
s__Yokenella_regensburgei	0.0251155	Low	High	k__Bacteria;p__Proteobacteria;c__Gammaproteobacteria;o__Enterobacterales;f__Enterobacteriaceae;g__Yokenella;s__Yokenella_regensburgei;
s__Erwinia_teleogrylli	0.0340961	Low	High	k__Bacteria;p__Proteobacteria;c__Gammaproteobacteria;o__Enterobacterales;f__Enterobacteriaceae;s__Erwinia_teleogrylli;
s__Enterobacteriaceae_bacterium_S05	0.0144678	Low	High	k__Bacteria;p__Proteobacteria;c__Gammaproteobacteria;o__Enterobacterales;f__Enterobacteriaceae;s__Enterobacteriaceae_bacterium_S05;
s__Pantoea_agglomerans	0.023917	Low	High	k__Bacteria;p__Proteobacteria;c__Gammaproteobacteria;o__Enterobacterales;f__Erwiniaceae;g__Pantoea;s__Pantoea_agglomerans;
s__Pantoea_alhagi	0.0427278	Low	High	k__Bacteria;p__Proteobacteria;c__Gammaproteobacteria;o__Enterobacterales;f__Erwiniaceae;g__Pantoea;s__Pantoea_alhagi;
s__Pantoea_vagans	0.0392385	Low	High	k__Bacteria;p__Proteobacteria;c__Gammaproteobacteria;o__Enterobacterales;f__Erwiniaceae;g__Pantoea;s__Pantoea_vagans;
s__Serratia_plymuthica	0.0131139	Low	High	k__Bacteria;p__Proteobacteria;c__Gammaproteobacteria;o__Enterobacterales;f__Yersiniaceae;g__Serratia;s__Serratia_plymuthica;
s__Haemophilus_haemolyticus	0.0270075	High	Low	k__Bacteria;p__Proteobacteria;c__Gammaproteobacteria;o__Pasteurellales;f__Pasteurellaceae;g__Haemophilus;s__Haemophilus_haemolyticus;
s__Haemophilus_influenzae	0.0343286	High	Low	k__Bacteria;p__Proteobacteria;c__Gammaproteobacteria;o__Pasteurellales;f__Pasteurellaceae;g__Haemophilus;s__Haemophilus_influenzae;
s__Haemophilus_parainfluenzae	0.00724833	High	Low	k__Bacteria;p__Proteobacteria;c__Gammaproteobacteria;o__Pasteurellales;f__Pasteurellaceae;g__Haemophilus;s__Haemophilus_parainfluenzae;
s__Haemophilus_pittmaniae	0.0251155	High	Low	k__Bacteria;p__Proteobacteria;c__Gammaproteobacteria;o__Pasteurellales;f__Pasteurellaceae;g__Haemophilus;s__Haemophilus_pittmaniae;
s__Haemophilus_sp._oral_taxon_036	0.0114786	High	Low	k__Bacteria;p__Proteobacteria;c__Gammaproteobacteria;o__Pasteurellales;f__Pasteurellaceae;g__Haemophilus;s__Haemophilus_sp._oral_taxon_036;
s__Haemophilus_sputorum	0.00923391	High	Low	k__Bacteria;p__Proteobacteria;c__Gammaproteobacteria;o__Pasteurellales;f__Pasteurellaceae;g__Haemophilus;s__Haemophilus_sputorum;
s__Treponema_succinifaciens	0.0284598	Low	High	k__Bacteria;p__Spirochaetes;c__Spirochaetia;o__Spirochaetales;f__Spirochaetaceae;g__Treponema;s__Treponema_succinifaciens;

## Sheet: Table S4. HCC
Taxonomy	Wilcoxon_Pvalue	HCC_CBR_group	HCC_NCB_group	Taxonomy_detail
p__Actinobacteria	0.0349398	High	Low	k__Bacteria;p__Actinobacteria;
c__Chitinophagia	0.0301626	High	Low	k__Bacteria;p__Bacteroidetes;c__Chitinophagia;
c__Negativicutes	0.00521195	Low	High	k__Bacteria;p__Firmicutes;c__Negativicutes;
o__Chitinophagales	0.0301626	High	Low	k__Bacteria;p__Bacteroidetes;c__Chitinophagia;o__Chitinophagales;
o__Synechococcales	0.0391467	High	Low	k__Bacteria;p__Cyanobacteria;o__Synechococcales;
o__Veillonellales	0.0014732	Low	High	k__Bacteria;p__Firmicutes;c__Negativicutes;o__Veillonellales;
o__Rhodocyclales	0.0391467	High	Low	k__Bacteria;p__Proteobacteria;c__Betaproteobacteria;o__Rhodocyclales;
o__Desulfarculales	0.0391467	High	Low	k__Bacteria;p__Proteobacteria;c__Deltaproteobacteria;o__Desulfarculales;
o__Chromatiales	0.0391467	High	Low	k__Bacteria;p__Proteobacteria;c__Gammaproteobacteria;o__Chromatiales;
o__Legionellales	0.0445191	Low	High	k__Bacteria;p__Proteobacteria;c__Gammaproteobacteria;o__Legionellales;
f__Chitinophagaceae	0.0301626	High	Low	k__Bacteria;p__Bacteroidetes;c__Chitinophagia;o__Chitinophagales;f__Chitinophagaceae;
f__Eubacteriaceae	0.00258116	High	Low	k__Bacteria;p__Firmicutes;c__Clostridia;o__Clostridiales;f__Eubacteriaceae;
f__Ruminococcaceae	0.0491543	High	Low	k__Bacteria;p__Firmicutes;c__Clostridia;o__Clostridiales;f__Ruminococcaceae;
f__Veillonellaceae	0.0014732	Low	High	k__Bacteria;p__Firmicutes;c__Negativicutes;o__Veillonellales;f__Veillonellaceae;
f__Leptotrichiaceae	0.0361895	Low	High	k__Bacteria;p__Fusobacteria;c__Fusobacteriia;o__Fusobacteriales;f__Leptotrichiaceae;
f__Desulfarculaceae	0.0391467	High	Low	k__Bacteria;p__Proteobacteria;c__Deltaproteobacteria;o__Desulfarculales;f__Desulfarculaceae;
f__Legionellaceae	0.0445191	Low	High	k__Bacteria;p__Proteobacteria;c__Gammaproteobacteria;o__Legionellales;f__Legionellaceae;
g__Gordonibacter	0.024812	High	Low	k__Bacteria;p__Actinobacteria;c__Coriobacteriia;o__Eggerthellales;f__Eggerthellaceae;g__Gordonibacter;
g__Paraprevotella	0.0444546	High	Low	k__Bacteria;p__Bacteroidetes;c__Bacteroidia;o__Bacteroidales;f__Prevotellaceae;g__Paraprevotella;
g__Prevotellamassilia	0.0327292	High	Low	k__Bacteria;p__Bacteroidetes;c__Bacteroidia;o__Bacteroidales;f__Prevotellaceae;g__Prevotellamassilia;
g__Capnocytophaga	0.0446126	High	Low	k__Bacteria;p__Bacteroidetes;c__Flavobacteriia;o__Flavobacteriales;f__Flavobacteriaceae;g__Capnocytophaga;
g__Ornithobacterium	0.0445191	Low	High	k__Bacteria;p__Bacteroidetes;c__Flavobacteriia;o__Flavobacteriales;f__Flavobacteriaceae;g__Ornithobacterium;
g__Clostridium	0.0249143	High	Low	k__Bacteria;p__Firmicutes;c__Clostridia;o__Clostridiales;f__Clostridiaceae;g__Clostridium;
g__Proteiniclasticum	0.00275496	High	Low	k__Bacteria;p__Firmicutes;c__Clostridia;o__Clostridiales;f__Clostridiaceae;g__Proteiniclasticum;
g__Emergencia	0.0445257	High	Low	k__Bacteria;p__Firmicutes;c__Clostridia;o__Clostridiales;f__Clostridiales_Family_XIII._Incertae_Sedis;g__Emergencia;
g__Ileibacterium	0.0344564	High	Low	k__Bacteria;p__Firmicutes;c__Clostridia;o__Clostridiales;f__Clostridiales_Family_XIII._Incertae_Sedis;g__Ileibacterium;
g__Eubacterium	0.00258116	High	Low	k__Bacteria;p__Firmicutes;c__Clostridia;o__Clostridiales;f__Eubacteriaceae;g__Eubacterium;
g__Hungateiclostridium	0.0217735	High	Low	k__Bacteria;p__Firmicutes;c__Clostridia;o__Clostridiales;f__Hungateiclostridiaceae;g__Hungateiclostridium;
g__Coprococcus	0.0363652	High	Low	k__Bacteria;p__Firmicutes;c__Clostridia;o__Clostridiales;f__Lachnospiraceae;g__Coprococcus;
g__Dorea	0.0491543	High	Low	k__Bacteria;p__Firmicutes;c__Clostridia;o__Clostridiales;f__Lachnospiraceae;g__Dorea;
g__Faecalicatena	0.0491543	High	Low	k__Bacteria;p__Firmicutes;c__Clostridia;o__Clostridiales;f__Lachnospiraceae;g__Faecalicatena;
g__Hespellia	0.0135291	High	Low	k__Bacteria;p__Firmicutes;c__Clostridia;o__Clostridiales;f__Lachnospiraceae;g__Hespellia;
g__Marvinbryantia	0.0310958	High	Low	k__Bacteria;p__Firmicutes;c__Clostridia;o__Clostridiales;f__Lachnospiraceae;g__Marvinbryantia;
g__Desulfurispora	0.0227965	High	Low	k__Bacteria;p__Firmicutes;c__Clostridia;o__Clostridiales;f__Peptococcaceae;g__Desulfurispora;
g__Asaccharospora	0.00887993	High	Low	k__Bacteria;p__Firmicutes;c__Clostridia;o__Clostridiales;f__Peptostreptococcaceae;g__Asaccharospora;
g__Faecalibacterium	0.0491543	High	Low	k__Bacteria;p__Firmicutes;c__Clostridia;o__Clostridiales;f__Ruminococcaceae;g__Faecalibacterium;
g__Gemmiger	0.0213294	High	Low	k__Bacteria;p__Firmicutes;c__Clostridia;o__Clostridiales;f__Ruminococcaceae;g__Gemmiger;
g__Massilimaliae	0.0354796	High	Low	k__Bacteria;p__Firmicutes;c__Clostridia;o__Clostridiales;f__Ruminococcaceae;g__Massilimaliae;
g__Allisonella	0.0253166	Low	High	k__Bacteria;p__Firmicutes;c__Negativicutes;o__Veillonellales;f__Veillonellaceae;g__Allisonella;
g__Veillonella	0.027948	Low	High	k__Bacteria;p__Firmicutes;c__Negativicutes;o__Veillonellales;f__Veillonellaceae;g__Veillonella;
g__Urinacoccus	0.00831231	High	Low	k__Bacteria;p__Firmicutes;c__Tissierellia;o__Tissierellales;f__Peptoniphilaceae;g__Urinacoccus;
g__Leptotrichia	0.0408631	Low	High	k__Bacteria;p__Fusobacteria;c__Fusobacteriia;o__Fusobacteriales;f__Leptotrichiaceae;g__Leptotrichia;
g__Herbaspirillum	0.0391467	High	Low	k__Bacteria;p__Proteobacteria;c__Betaproteobacteria;o__Burkholderiales;f__Oxalobacteraceae;g__Herbaspirillum;
g__Nissabacter	0.0391467	High	Low	k__Bacteria;p__Proteobacteria;c__Gammaproteobacteria;o__Enterobacterales;f__Yersiniaceae;g__Nissabacter;
s__Actinomyces_sp._oral_taxon_414	0.0175194	High	Low	k__Bacteria;p__Actinobacteria;c__Actinobacteria;o__Actinomycetales;f__Actinomycetaceae;g__Actinomyces;s__Actinomyces_sp._oral_taxon_414;
s__Bifidobacterium_biavatii	0.00822853	High	Low	k__Bacteria;p__Actinobacteria;c__Actinobacteria;o__Bifidobacteriales;f__Bifidobacteriaceae;g__Bifidobacterium;s__Bifidobacterium_biavatii;
s__Olsenella_sp._oral_taxon_807	0.0119403	High	Low	k__Bacteria;p__Actinobacteria;c__Coriobacteriia;o__Coriobacteriales;f__Atopobiaceae;g__Olsenella;s__Olsenella_sp._oral_taxon_807;
s__Collinsella_bouchesdurhonensis	0.021684	High	Low	k__Bacteria;p__Actinobacteria;c__Coriobacteriia;o__Coriobacteriales;f__Coriobacteriaceae;g__Collinsella;s__Collinsella_bouchesdurhonensis;
s__Collinsella_ihuae	0.00667142	High	Low	k__Bacteria;p__Actinobacteria;c__Coriobacteriia;o__Coriobacteriales;f__Coriobacteriaceae;g__Collinsella;s__Collinsella_ihuae;
s__Collinsella_tanakaei	0.0443108	High	Low	k__Bacteria;p__Actinobacteria;c__Coriobacteriia;o__Coriobacteriales;f__Coriobacteriaceae;g__Collinsella;s__Collinsella_tanakaei;
s__Porphyromonas_bennonis	0.00483183	High	Low	k__Bacteria;p__Bacteroidetes;c__Bacteroidia;o__Bacteroidales;f__Porphyromonadaceae;g__Porphyromonas;s__Porphyromonas_bennonis;
s__Paraprevotella_xylaniphila	0.0444546	High	Low	k__Bacteria;p__Bacteroidetes;c__Bacteroidia;o__Bacteroidales;f__Prevotellaceae;g__Paraprevotella;s__Paraprevotella_xylaniphila;
s__Prevotella_buccalis	0.0491543	High	Low	k__Bacteria;p__Bacteroidetes;c__Bacteroidia;o__Bacteroidales;f__Prevotellaceae;g__Prevotella;s__Prevotella_buccalis;
s__Prevotella_loescheii	0.0494662	High	Low	k__Bacteria;p__Bacteroidetes;c__Bacteroidia;o__Bacteroidales;f__Prevotellaceae;g__Prevotella;s__Prevotella_loescheii;
s__Prevotella_sp._oral_taxon_299	0.0154347	High	Low	k__Bacteria;p__Bacteroidetes;c__Bacteroidia;o__Bacteroidales;f__Prevotellaceae;g__Prevotella;s__Prevotella_sp._oral_taxon_299;
s__Prevotellamassilia_timonensis	0.0327292	High	Low	k__Bacteria;p__Bacteroidetes;c__Bacteroidia;o__Bacteroidales;f__Prevotellaceae;g__Prevotellamassilia;s__Prevotellamassilia_timonensis;
s__Ornithobacterium_rhinotracheale	0.0445191	Low	High	k__Bacteria;p__Bacteroidetes;c__Flavobacteriia;o__Flavobacteriales;f__Flavobacteriaceae;g__Ornithobacterium;s__Ornithobacterium_rhinotracheale;
s__Staphylococcus_saprophyticus	0.0445191	Low	High	k__Bacteria;p__Firmicutes;c__Bacilli;o__Bacillales;f__Staphylococcaceae;g__Staphylococcus;s__Staphylococcus_saprophyticus;
s__Enterococcus_gilvus	0.0363028	High	Low	k__Bacteria;p__Firmicutes;c__Bacilli;o__Lactobacillales;f__Enterococcaceae;g__Enterococcus;s__Enterococcus_gilvus;
s__Lactobacillus_acetotolerans	0.0391467	High	Low	k__Bacteria;p__Firmicutes;c__Bacilli;o__Lactobacillales;f__Lactobacillaceae;g__Lactobacillus;s__Lactobacillus_acetotolerans;
s__Lactobacillus_crustorum	0.0391467	High	Low	k__Bacteria;p__Firmicutes;c__Bacilli;o__Lactobacillales;f__Lactobacillaceae;g__Lactobacillus;s__Lactobacillus_crustorum;
s__Lactobacillus_hamsteri	0.0391467	High	Low	k__Bacteria;p__Firmicutes;c__Bacilli;o__Lactobacillales;f__Lactobacillaceae;g__Lactobacillus;s__Lactobacillus_hamsteri;
s__Lactobacillus_johnsonii	0.0417021	High	Low	k__Bacteria;p__Firmicutes;c__Bacilli;o__Lactobacillales;f__Lactobacillaceae;g__Lactobacillus;s__Lactobacillus_johnsonii;
s__Lactobacillus_parabuchneri	0.0391467	High	Low	k__Bacteria;p__Firmicutes;c__Bacilli;o__Lactobacillales;f__Lactobacillaceae;g__Lactobacillus;s__Lactobacillus_parabuchneri;
s__Lactobacillus_ruminis	0.0317248	High	Low	k__Bacteria;p__Firmicutes;c__Bacilli;o__Lactobacillales;f__Lactobacillaceae;g__Lactobacillus;s__Lactobacillus_ruminis;
s__Clostridium_bornimense	0.0466773	High	Low	k__Bacteria;p__Firmicutes;c__Clostridia;o__Clostridiales;f__Clostridiaceae;g__Clostridium;s__Clostridium_bornimense;
s__Clostridium_isatidis	0.0398266	High	Low	k__Bacteria;p__Firmicutes;c__Clostridia;o__Clostridiales;f__Clostridiaceae;g__Clostridium;s__Clostridium_isatidis;
s__Clostridium_sp._SY8519	0.0491543	High	Low	k__Bacteria;p__Firmicutes;c__Clostridia;o__Clostridiales;f__Clostridiaceae;g__Clostridium;s__Clostridium_sp._SY8519;
s__Clostridium_sporogenes	0.0151961	High	Low	k__Bacteria;p__Firmicutes;c__Clostridia;o__Clostridiales;f__Clostridiaceae;g__Clostridium;s__Clostridium_sporogenes;
s__Clostridium_sulfidigenes	0.0175765	High	Low	k__Bacteria;p__Firmicutes;c__Clostridia;o__Clostridiales;f__Clostridiaceae;g__Clostridium;s__Clostridium_sulfidigenes;
s__Clostridium_tepidiprofundi	0.00364332	High	Low	k__Bacteria;p__Firmicutes;c__Clostridia;o__Clostridiales;f__Clostridiaceae;g__Clostridium;s__Clostridium_tepidiprofundi;
s__Clostridium_thermobutyricum	0.0343167	High	Low	k__Bacteria;p__Firmicutes;c__Clostridia;o__Clostridiales;f__Clostridiaceae;g__Clostridium;s__Clostridium_thermobutyricum;
s__Proteiniclasticum_ruminis	0.00275496	High	Low	k__Bacteria;p__Firmicutes;c__Clostridia;o__Clostridiales;f__Clostridiaceae;g__Proteiniclasticum;s__Proteiniclasticum_ruminis;
s__Emergencia_timonensis	0.0445257	High	Low	k__Bacteria;p__Firmicutes;c__Clostridia;o__Clostridiales;f__Clostridiales_Family_XIII._Incertae_Sedis;g__Emergencia;s__Emergencia_timonensis;
s__Ileibacterium_massiliense	0.0344564	High	Low	k__Bacteria;p__Firmicutes;c__Clostridia;o__Clostridiales;f__Clostridiales_Family_XIII._Incertae_Sedis;g__Ileibacterium;s__Ileibacterium_massiliense;
s__Eubacterium_hallii	0.00387586	High	Low	k__Bacteria;p__Firmicutes;c__Clostridia;o__Clostridiales;f__Eubacteriaceae;g__Eubacterium;s__Eubacterium_hallii;
s__Eubacterium_coprostanoligenes	0.0380821	High	Low	k__Bacteria;p__Firmicutes;c__Clostridia;o__Clostridiales;f__Eubacteriaceae;g__Eubacterium;s__Eubacterium_coprostanoligenes;
s__Eubacterium_ventriosum	0.0327874	High	Low	k__Bacteria;p__Firmicutes;c__Clostridia;o__Clostridiales;f__Eubacteriaceae;g__Eubacterium;s__Eubacterium_ventriosum;
s__Eubacterium_xylanophilum	0.025609	High	Low	k__Bacteria;p__Firmicutes;c__Clostridia;o__Clostridiales;f__Eubacteriaceae;g__Eubacterium;s__Eubacterium_xylanophilum;
s__Ruminiclostridium_hungatei	0.0211217	High	Low	k__Bacteria;p__Firmicutes;c__Clostridia;o__Clostridiales;f__Hungateiclostridiaceae;g__Ruminiclostridium;s__Ruminiclostridium_hungatei;
s__Blautia_obeum	0.0170413	High	Low	k__Bacteria;p__Firmicutes;c__Clostridia;o__Clostridiales;f__Lachnospiraceae;g__Blautia;s__Blautia_obeum;
s__Coprococcus_comes	0.0402705	High	Low	k__Bacteria;p__Firmicutes;c__Clostridia;o__Clostridiales;f__Lachnospiraceae;g__Coprococcus;s__Coprococcus_comes;
s__Coprococcus_eutactus	0.0491543	High	Low	k__Bacteria;p__Firmicutes;c__Clostridia;o__Clostridiales;f__Lachnospiraceae;g__Coprococcus;s__Coprococcus_eutactus;
s__Dorea_longicatena	0.0295154	High	Low	k__Bacteria;p__Firmicutes;c__Clostridia;o__Clostridiales;f__Lachnospiraceae;g__Dorea;s__Dorea_longicatena;
s__Faecalicatena_contorta	0.0170413	High	Low	k__Bacteria;p__Firmicutes;c__Clostridia;o__Clostridiales;f__Lachnospiraceae;g__Faecalicatena;s__Faecalicatena_contorta;
s__Hespellia_stercorisuis	0.0135291	High	Low	k__Bacteria;p__Firmicutes;c__Clostridia;o__Clostridiales;f__Lachnospiraceae;g__Hespellia;s__Hespellia_stercorisuis;
s__Marvinbryantia_formatexigens	0.0310958	High	Low	k__Bacteria;p__Firmicutes;c__Clostridia;o__Clostridiales;f__Lachnospiraceae;g__Marvinbryantia;s__Marvinbryantia_formatexigens;
s__Desulfurispora_thermophila	0.0227965	High	Low	k__Bacteria;p__Firmicutes;c__Clostridia;o__Clostridiales;f__Peptococcaceae;g__Desulfurispora;s__Desulfurispora_thermophila;
s__Asaccharospora_irregularis	0.00887993	High	Low	k__Bacteria;p__Firmicutes;c__Clostridia;o__Clostridiales;f__Peptostreptococcaceae;g__Asaccharospora;s__Asaccharospora_irregularis;
s__Faecalibacterium_prausnitzii	0.0491543	High	Low	k__Bacteria;p__Firmicutes;c__Clostridia;o__Clostridiales;f__Ruminococcaceae;g__Faecalibacterium;s__Faecalibacterium_prausnitzii;
s__Gemmiger_formicilis	0.0213294	High	Low	k__Bacteria;p__Firmicutes;c__Clostridia;o__Clostridiales;f__Ruminococcaceae;g__Gemmiger;s__Gemmiger_formicilis;
s__Massilimaliae_massiliensis	0.0354796	High	Low	k__Bacteria;p__Firmicutes;c__Clostridia;o__Clostridiales;f__Ruminococcaceae;g__Massilimaliae;s__Massilimaliae_massiliensis;
s__Ruminococcus_albus	0.0273885	High	Low	k__Bacteria;p__Firmicutes;c__Clostridia;o__Clostridiales;f__Ruminococcaceae;g__Ruminococcus;s__Ruminococcus_albus;
s__Ruminococcus_callidus	0.0402705	High	Low	k__Bacteria;p__Firmicutes;c__Clostridia;o__Clostridiales;f__Ruminococcaceae;g__Ruminococcus;s__Ruminococcus_callidus;
s_Clostridium_cellulosi	0.0490505	High	Low	k__Bacteria;p__Firmicutes;c__Clostridia;o__Clostridiales;f__Ruminococcaceae;s_Clostridium_cellulosi;
s_Eubacterium_siraeum	0.0444546	High	Low	k__Bacteria;p__Firmicutes;c__Clostridia;o__Clostridiales;f__Ruminococcaceae;s_Eubacterium_siraeum;
s__Ruminococcaceae_bacterium_CPB6	0.0346301	High	Low	k__Bacteria;p__Firmicutes;c__Clostridia;o__Clostridiales;f__Ruminococcaceae;s__Ruminococcaceae_bacterium_CPB6;
s__Fenollaria_timonensis	0.0340288	High	Low	k__Bacteria;p__Firmicutes;c__Clostridia;o__Clostridiales;g__Fenollaria;s__Fenollaria_timonensis;
s__Clostridiales_bacterium	0.0196376	High	Low	k__Bacteria;p__Firmicutes;c__Clostridia;o__Clostridiales;s__Clostridiales_bacterium;
s__Allisonella_histaminiformans	0.0253166	Low	High	k__Bacteria;p__Firmicutes;c__Negativicutes;o__Veillonellales;f__Veillonellaceae;g__Allisonella;s__Allisonella_histaminiformans;
s__Dialister_sp._Marseille-P5638	0.0441269	Low	High	k__Bacteria;p__Firmicutes;c__Negativicutes;o__Veillonellales;f__Veillonellaceae;g__Dialister;s__Dialister_sp._Marseille-P5638;
s__Dialister_succinatiphilus	0.0253166	Low	High	k__Bacteria;p__Firmicutes;c__Negativicutes;o__Veillonellales;f__Veillonellaceae;g__Dialister;s__Dialister_succinatiphilus;
s__Veillonella_montpellierensis	0.0286207	Low	High	k__Bacteria;p__Firmicutes;c__Negativicutes;o__Veillonellales;f__Veillonellaceae;g__Veillonella;s__Veillonella_montpellierensis;
s__Veillonella_parvula	0.0221608	Low	High	k__Bacteria;p__Firmicutes;c__Negativicutes;o__Veillonellales;f__Veillonellaceae;g__Veillonella;s__Veillonella_parvula;
s__Veillonella_rodentium	0.0363028	Low	High	k__Bacteria;p__Firmicutes;c__Negativicutes;o__Veillonellales;f__Veillonellaceae;g__Veillonella;s__Veillonella_rodentium;
s__Peptoniphilus_grossensis	0.00949902	High	Low	k__Bacteria;p__Firmicutes;c__Tissierellia;o__Tissierellales;f__Peptoniphilaceae;g__Peptoniphilus;s__Peptoniphilus_grossensis;
s__Peptoniphilus_lacrimalis	0.0211217	High	Low	k__Bacteria;p__Firmicutes;c__Tissierellia;o__Tissierellales;f__Peptoniphilaceae;g__Peptoniphilus;s__Peptoniphilus_lacrimalis;
s__Urinacoccus_massiliensis	0.00831231	High	Low	k__Bacteria;p__Firmicutes;c__Tissierellia;o__Tissierellales;f__Peptoniphilaceae;g__Urinacoccus;s__Urinacoccus_massiliensis;
s__Leptotrichia_trevisanii	0.0481093	Low	High	k__Bacteria;p__Fusobacteria;c__Fusobacteriia;o__Fusobacteriales;f__Leptotrichiaceae;g__Leptotrichia;s__Leptotrichia_trevisanii;
s__Leptotrichia_wadei	0.0201898	Low	High	k__Bacteria;p__Fusobacteria;c__Fusobacteriia;o__Fusobacteriales;f__Leptotrichiaceae;g__Leptotrichia;s__Leptotrichia_wadei;
s__Variovorax_paradoxus	0.0445191	Low	High	k__Bacteria;p__Proteobacteria;c__Betaproteobacteria;o__Burkholderiales;f__Comamonadaceae;g__Variovorax;s__Variovorax_paradoxus;
s__Citrobacter_portucalensis	0.0490505	Low	High	k__Bacteria;p__Proteobacteria;c__Gammaproteobacteria;o__Enterobacterales;f__Enterobacteriaceae;g__Citrobacter;s__Citrobacter_portucalensis;
s__Nissabacter_archeti	0.0391467	High	Low	k__Bacteria;p__Proteobacteria;c__Gammaproteobacteria;o__Enterobacterales;f__Yersiniaceae;g__Nissabacter;s__Nissabacter_archeti;
s__Treponema_socranskii	0.0237875	High	Low	k__Bacteria;p__Spirochaetes;c__Spirochaetia;o__Spirochaetales;f__Spirochaetaceae;g__Treponema;s__Treponema_socranskii;
